# Supplementary material
Source: PubMed Central journal article supplement (PMC2922426)
Supplement: NIHMS211022-supplement-01.pdf [file NIHMS211022-supplement-01.pdf]

## **SUPPLEMENTAL DATA:**

### **Supplemental data S1: Quantitative Aspects of Linear Physical Programming:**

**Intra-Criteria and Inter-Criteria Preference:** For a given objective, once the DM decides to which class the criterion belongs, and chooses the range targets (i.e.  $t_{is}^+$ ,  $t_{is}^-$ ), the *intra-criterion* preference statement is complete. However, since decisions are made in a multi-objective environment, there must be an implicit or explicit *inter-criteria* preference. Linear physical programming operates within an implied inter-criteria heuristic rule that is hereby called the *One vs. Others* criteria-rule (OVO rule).

The OVO-rule entails the following inter-criteria preference for each soft criterion,  $g_j$ . If two options are considered, viz.,

*Option 1:* "Full improvement of  $g_j$  across a given range (say, range-3)"; and

*Option 2:* "Full reduction of all the other criteria across the next better range (i.e., range-2)"; then option 1 shall be preferred over option 2.

That is, the worst candidate is always helped first. Essentially, this philosophy has a built-in preemptive nature in which the minimization of the worst criterion is automatically implied. Say, for example that we are dealing with 15 criteria. The OVO rule states that: it is more beneficial for a single criterion to improve over the full *tolerable* range, than it is for the other 14 to improve over the full *desirable* range. The mathematical implication of the OVO rule is discussed later.

## Development of Class Function:

In this section we define and discuss the properties of class functions (Figures 3c-f), and develop the LP model representation of generic class functions. This model will be used in the statement of the linear physical programming mathematical model. We also discuss in some detail the structure of a generic class function.

We first state the class function properties; which is followed by a discussion thereof. These properties are as follows:

- (i) A lower value of a class function is preferred over a higher value thereof.
- (ii) A class function is strictly positive.
- (iii) A class function is continuous, piecewise linear, and convex.
- (iv) The value of a class function,  $z_i$ , at a given ranges-intersection (say, *desirable-tolerable*) is the same for any class-type.
- (v) The magnitude of the class-function's vertical excursion across any range must satisfy the OVO-rule.

Collectively, these properties provide the flexibility required of the linear physical programming methodology. We make the following observations:

- Since a lower value of the class function is better than a higher value thereof, *class functions* and *utility functions* have distinct structures (while fulfilling the same function).
- The positivity property of the class function allows the DM to define an *ideal* finite value, zero.

- The rationale for the convexity requirement is partially rooted in the axioms of utility theory. In our particular case, it means that the cost of traveling across, say, the *undesirable* range is always more than that of traveling across the *tolerable* range; regardless of the target values chosen by the DM. (We note that the OVO rule, alone, does not guaranty convexity.)
- The value of the class function at a given range limit (say,  $z_i(t_{i2}^+)$ ) is always constant (see Figure 3). From criterion to criterion, only the *location* of the limits (say  $t_{i2}^+$ ) change, not the corresponding  $z_i$  values. As a consequence, as one *travels* across a given range-type (say *tolerable*), the change in the class-function will always be of the same magnitude,  $\tilde{z}^3$ , regardless of the criterion in question. This behavior of the class function values at the boundaries is the critical factor that makes each range-type have the same numerical *cost/value* for different criteria. This same behavior also has a *normalizing effect*, and results in favorable numerical conditioning properties.

Table 3 represents the mathematical representations of some of the Property (iv) of the class function discussed above is expressed by the relation

$$z^s \equiv z_i(t_{is}^+) \equiv z_i(t_{is}^-) \quad \forall i \quad ; \quad (2 \leq s \leq 5) ; \quad z^1 \equiv 0 \quad (2)$$

where ‘s’ and ‘i’ respectively denote a generic range-intersection and criterion number.

- (b) The change in  $z_i$  that takes place as one *travels* across the s-th range is always given by

$$\tilde{z}^s \equiv z^s - z^{s-1} \quad ; \quad (2 \leq s \leq 5) ; \quad z^1 \equiv 0 \quad (3)$$

- (c) To enforce the OVO rule, we apply the relationship

$$\tilde{z}^s > (n_{sc}-1)\tilde{z}^{s-1} \quad (3 \leq s \leq 5); (n_{sc} > 1) \quad (4)$$

or, equivalently

$$\tilde{z}^s = \beta (n_{sc}-1)\tilde{z}^{s-1} \quad (3 \leq s \leq 5); n_{sc} > 1; \beta > 1 \quad (5)$$

where  $n_{sc}$  denotes the number of *soft* criteria, and  $\beta$  will be used as a *convexity parameter*.

Equation 5 does not guaranty convexity of the class function, as the said convexity depends also on the targets chosen. To apply Equation (5), we need to be given a value for  $\tilde{z}^2$ . In practice, a small positive number will be appropriate (say, 0.1).

(d) Turning our attention to the convexity requirement, we define

$$\tilde{t}_{is}^+ = t_{is}^+ - t_{i(s-1)}^+; \tilde{t}_{is}^- = t_{is}^- - t_{i(s-1)}^-; \quad (2 \leq s \leq 5) \quad (6)$$

which is the length of the  $s$ -th range of the  $i$ -th criterion. With this quantity, the *magnitude* of the slopes of the class function of the generic  $i$ -th criterion takes the form

$$w_{is}^+ = \tilde{z}^s / \tilde{t}_{is}^+; w_{is}^- = \tilde{z}^s / \tilde{t}_{is}^-; \quad (2 \leq s \leq 5) \quad (7)$$

We emphasize here that the slopes change from range to range and from criterion to criterion. Once the slopes are known, the convexity requirement can be verified by the relationship

$$\tilde{w}_{min} = \min_{i,s} \{ \tilde{w}_{is}^+, \tilde{w}_{is}^- \} > 0; \quad \left. \begin{array}{l} \text{ } \\ \text{ } \end{array} \right\} \begin{array}{l} (2 \leq s \leq 5) \\ i : \text{soft criteria} \end{array} \quad (8)$$

where

$$\tilde{w}_{is}^+ = w_{is}^+ - w_{i(s-1)}^+ ; \tilde{w}_{is}^- = w_{is}^- - w_{i(s-1)}^- ; w_{i1}^- = w_{i1}^+ = 0 \quad \left\{ \begin{array}{l} (2 \leq s \leq 5) \\ i: \text{soft criteria} \end{array} \right. \quad (9)$$

We note here that the quantities  $\tilde{w}_{is}^+$  and  $\tilde{w}_{is}^-$  are exactly the weights that will be used in the LP model of the class functions. In effect, equation (8) states that so long as all these weights are positive, the class function will be peicewise linear and convex. The important point here is to observe that convexity can always be satisfied by simply increasing the magnitude of the *convexity parameter*  $\beta$ .

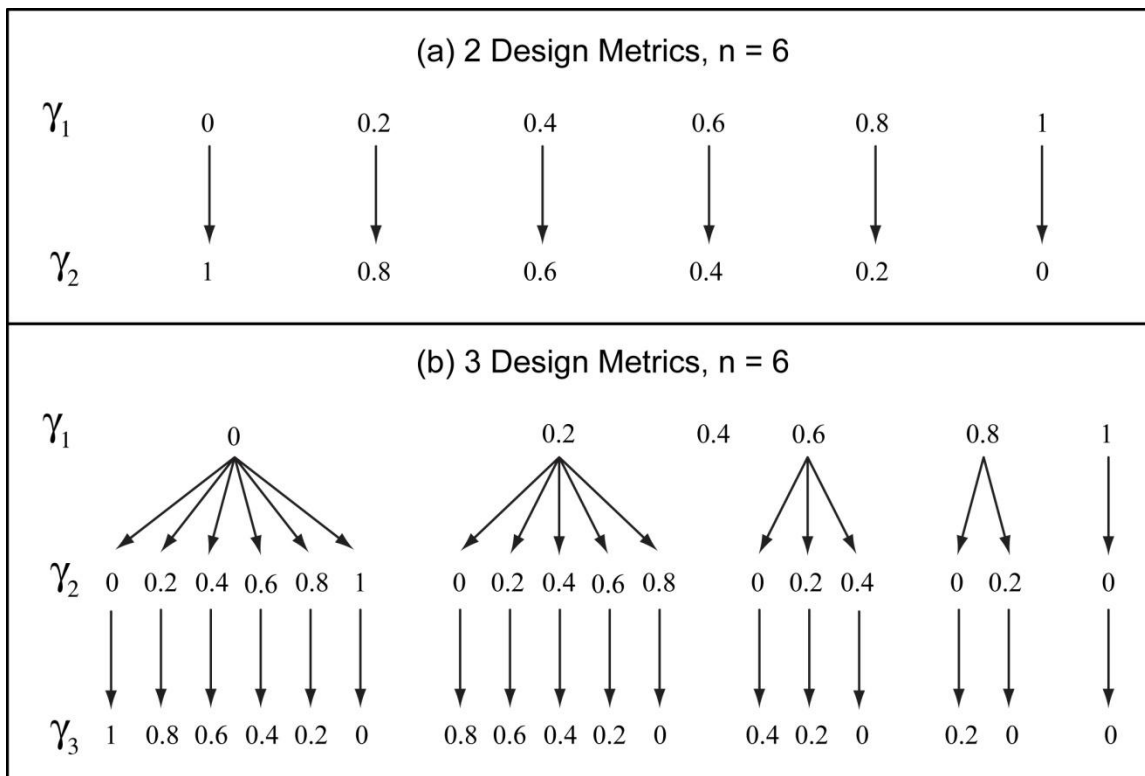

**Figure S1:** Non-dimensional parameters used in the generation of the Pareto optimal solutions for translating the AOF surface across the objective space.

Figure S2

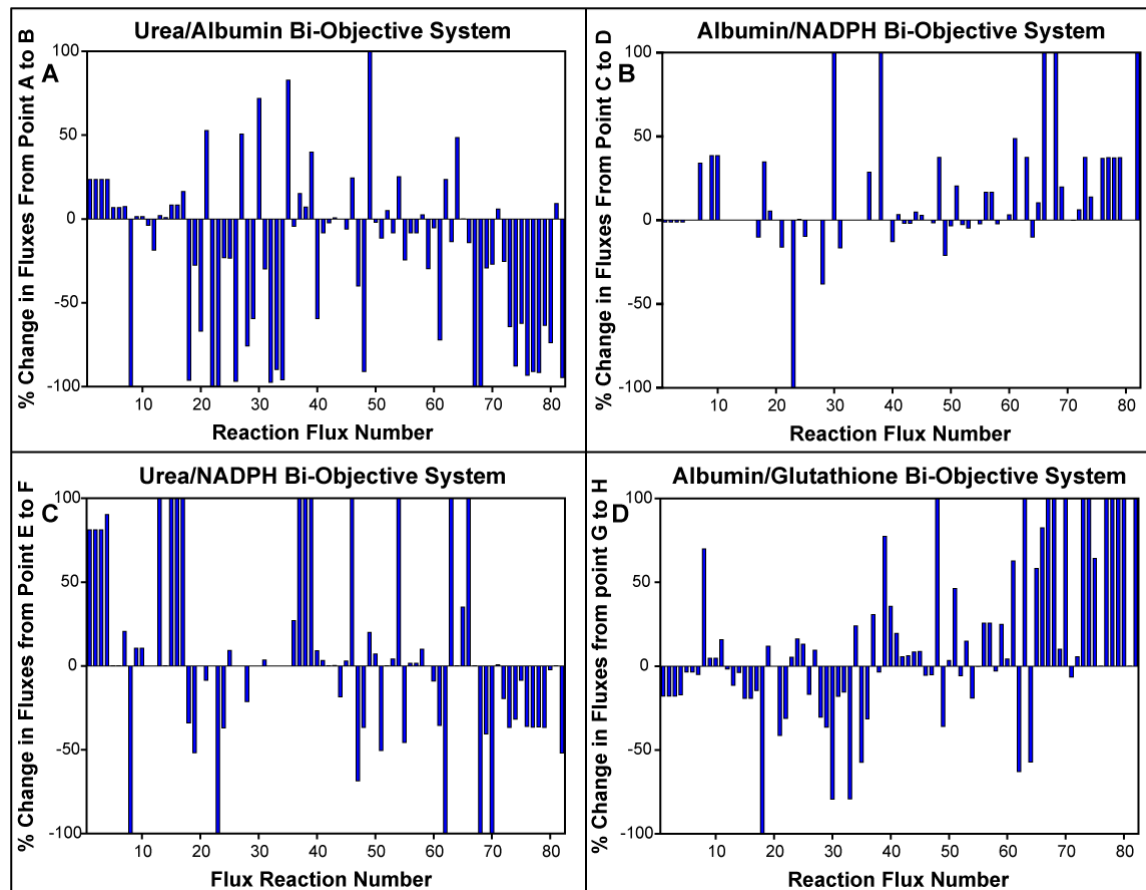

**Figure S2:** Metabolic profiling of percentage change in Pareto optimal fluxes for various solutions of Figure 4. These results are for various combinations of objectives and the corresponding flux values are in Table S2. Only changes up to  $\pm 100\%$  are shown.

Figure S3

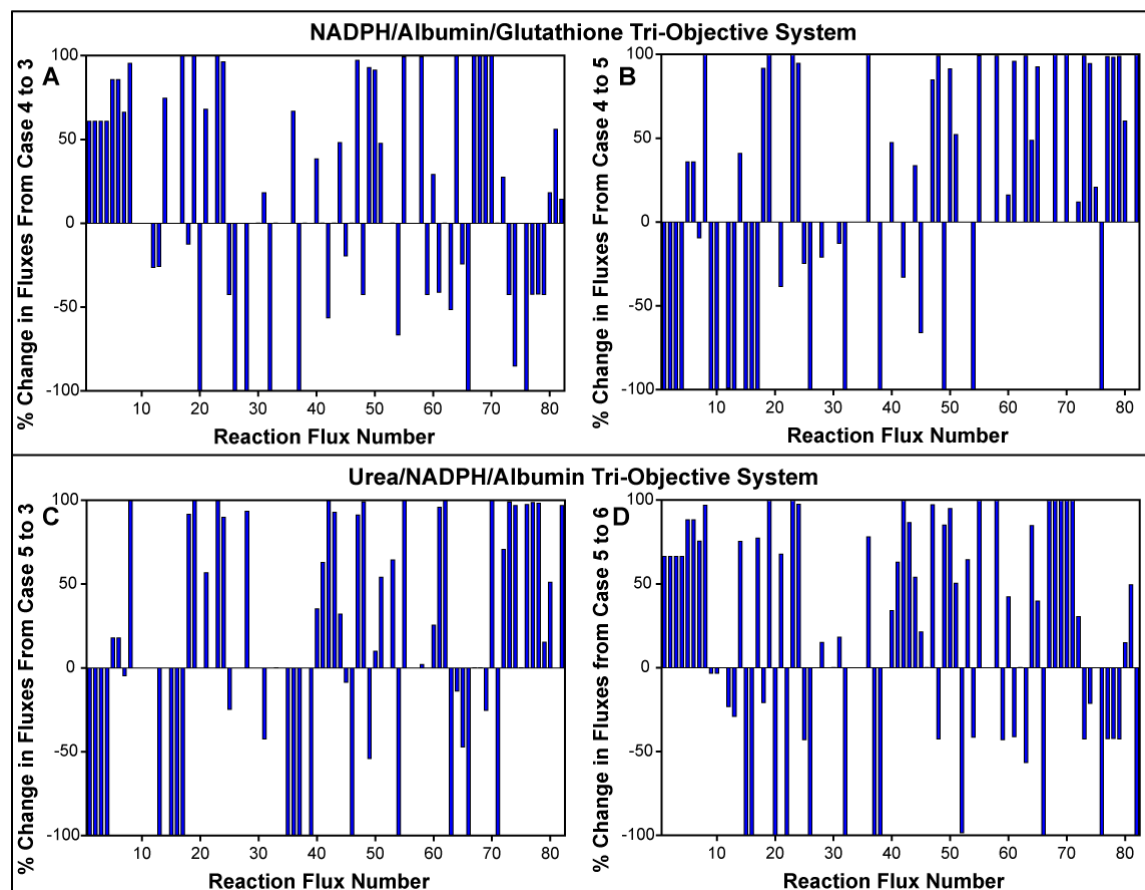

**Figure S3:** A-D) Metabolic profiling of percentage change in Pareto optimal fluxes for various solutions of Tables 1 and 2. These results are for various combinations of objectives and the corresponding flux values are in Table S1. Only changes up to  $\pm 100\%$  are shown.



**Table S1: Hepatic stoichiometric reactions**

| No | Stoichiometry                                                                                                                                                                                                                                          |
|----|--------------------------------------------------------------------------------------------------------------------------------------------------------------------------------------------------------------------------------------------------------|
| 1  | $F6P \leftrightarrow G6P$                                                                                                                                                                                                                              |
| 2  | $F16P2 + H_2O \rightarrow F6P + P_i$                                                                                                                                                                                                                   |
| 3  | $2 G3P \leftrightarrow F16P2$                                                                                                                                                                                                                          |
| 4  | $3Pglyc + NADH + H^+ + ATP \leftrightarrow G3P + P_i + NAD^+ + ADP$                                                                                                                                                                                    |
| 5  | $PEP \leftrightarrow 3Pglyc$                                                                                                                                                                                                                           |
| 6  | $oac + GTP \rightarrow PEP + GDP + CO_2$                                                                                                                                                                                                               |
| 7  | $pyr + CO_2 + ATP + H_2O \rightarrow oac + ADP + P_i + 2 H^+$                                                                                                                                                                                          |
| 8  | $pyr + NADPH + CO_2 \leftrightarrow mal + NADP^+$                                                                                                                                                                                                      |
| 9  | $oac + acCoA + H_2O \rightarrow ctt + CoASH$                                                                                                                                                                                                           |
| 10 | $ctt + NADP^+ \leftrightarrow \alpha kgl + CO_2 + NADPH + H^+$                                                                                                                                                                                         |
| 11 | $\alpha kgl + NAD^+ + CoASH \rightarrow sucCoA + CO_2 + NADH + H^+$                                                                                                                                                                                    |
| 12 | $sucCoA + P_i + GDP + FAD \leftrightarrow fum + GTP + FADH_2 + CoASH$                                                                                                                                                                                  |
| 13 | $fum + H_2O \leftrightarrow mal$                                                                                                                                                                                                                       |
| 14 | $mal + NAD^+ \leftrightarrow oac + NADH + H^+$                                                                                                                                                                                                         |
| 15 | $ctr + asp + ATP \rightarrow arg + fum + AMP + PP_i$                                                                                                                                                                                                   |
| 16 | $orn + (CO_2 + NH_4^+ + 2 ATP) + H_2O \rightarrow ctr + 2 ADP + 2 P_i + 3 H^+$                                                                                                                                                                         |
| 17 | $arg + H_2O \rightarrow urea + orn$                                                                                                                                                                                                                    |
| 18 | $ala + 0.5 NAD^+ + 0.5 NADP^+ + H_2O \leftrightarrow pyr + NH_3 + 0.5 NADH + 0.5 NADPH + H^+$                                                                                                                                                          |
| 19 | $ser \rightarrow pyr + NH_3$                                                                                                                                                                                                                           |
| 20 | $cys + 0.5 NAD^+ + 0.5 NADP^+ + H_2O + SO_3^{2-} \leftrightarrow pyr + thiosulfate + NH_4^+ + 0.5 NADPH + 0.5 NADH$                                                                                                                                    |
| 21 | $thr + NAD^+ + ATP + CoASH \rightarrow gly + acCoA + NADH + H^+ + AMP + PP_i$                                                                                                                                                                          |
| 22 | $thr + NAD^+ + CoASH \rightarrow propCoA + CO_2 + NADH + H^+ + NH_3 + H_2$                                                                                                                                                                             |
| 23 | $2 gly + NAD^+ + THF + H_2O \leftrightarrow NTHF + H^+ + CO_2 + NH_4^+ + ser + NADH$                                                                                                                                                                   |
| 24 | $3Pglyc + NAD^+ + glu + H_2O \rightarrow NADH + H^+ + \alpha kgl + ser + P_i$<br>$trp + 3 O_2 + 4 H_2O + 2 NAD^+ + FAD + CoASH \rightarrow Formate + ala + 2 CO_2 + NH_3 + 3 NADH + FADH_2 + HCO_3^- +$                                                |
| 25 | $acacCoA$                                                                                                                                                                                                                                              |
| 26 | $propCoA + CO_2 + ATP \rightarrow ADP + P_i + sucCoA$                                                                                                                                                                                                  |
| 27 | $lys + 2 \alpha kgl + 2 NAD^+ + CoASH + FAD + 2 H_2O + NADP^+ \rightarrow CO_2 + NH_3 + acacCoA + 5 NADH + FADH_2$                                                                                                                                     |
| 28 | $phe + O_2 + H_4biopterin + H^+ \rightarrow tyr + H_2O + H_2biopterin$                                                                                                                                                                                 |
| 29 | $tyr + \alpha kgl + 2 O_2 + H_2O \rightarrow glu + CO_2 + fum + acac$                                                                                                                                                                                  |
| 30 | $pro + 0.5 O_2 + 0.5 NAD^+ + 0.5 NADP^+ \rightarrow glu + 0.5 NADH + 0.5 NADPH + H^+$                                                                                                                                                                  |
| 31 | $his + H_4folate + 2 H_2O \rightarrow NH_4^+ + N^5, N^{10}-CH_2-H_4folate + glu$                                                                                                                                                                       |
| 32 | $met + ATP + ser + NAD^+ + H_2O + CoASH \rightarrow PP_i + P_i + adenosine + cys + NADH + H^+ + CO_2 + NH_4^+ + propCoA$                                                                                                                               |
| 33 | $val + \alpha kgl + 3 NAD^+ + 2 H_2O + FAD + CoA \rightarrow glu + 2 CO_2 + 3 NADH + 2 H^+ + FADH_2 + CO_2 + propCoA$                                                                                                                                  |
| 34 | $iso + \alpha kgl + H_2O + 2 NAD^+ + FAD + 2 CoASH \rightarrow glu + CO_2 + 2 NADH + 2H^+ + FADH_2 + acCoA + propCoA$<br>$leu + \alpha kgl + H_2O + NAD^+ + FAD + ATP + CoASH + HCO_3^- \rightarrow glu + CO_2 + NADH + H^+ + FADH_2 + acCoA + acac +$ |
| 35 | $ADP + P_i$                                                                                                                                                                                                                                            |
| 36 | $oac + glu \leftrightarrow \alpha kgl + asp$                                                                                                                                                                                                           |
| 37 | $asn + H_2O \rightarrow asp + NH_3$                                                                                                                                                                                                                    |
| 38 | $glu + 0.5 NAD^+ + 0.5 NADP^+ + H_2O \leftrightarrow NH_4^+ + \alpha kgl + 0.5 NADPH + 0.5 NADH + H^+$                                                                                                                                                 |
| 39 | $orn + NAD^+ + NADP^+ + H_2O \rightarrow glu + NH_4^+ + NADH + NADPH + H^+$                                                                                                                                                                            |
| 40 | $gln + H_2O \rightarrow glu + NH_4^+$                                                                                                                                                                                                                  |
| 41 | $palm + ATP + 7 FAD + 7 NAD^+ \rightarrow 8 acCoA + 7 FADH_2 + 7 NADH + AMP + PP_i$                                                                                                                                                                    |
| 42 | $2 acCoA \leftrightarrow acacCoA + CoA$                                                                                                                                                                                                                |

|    |                                                                                                                                                                                                                                                                                                                                                                                                              |
|----|--------------------------------------------------------------------------------------------------------------------------------------------------------------------------------------------------------------------------------------------------------------------------------------------------------------------------------------------------------------------------------------------------------------|
| 43 | $\text{acacCoA} + \text{H}_2\text{O} \rightarrow \text{acac} + \text{CoA}$                                                                                                                                                                                                                                                                                                                                   |
| 44 | $\text{NADH} + \text{H}^+ + 0.5 \text{O}_2 + 3 \text{ADP} \rightarrow \text{NAD}^+ + \text{H}_2\text{O} + 3 \text{ATP}$                                                                                                                                                                                                                                                                                      |
| 45 | $\text{FADH}_2 + 0.5 \text{O}_2 + 2 \text{ADP} \rightarrow \text{FAD} + \text{H}_2\text{O} + 2 \text{ATP}$                                                                                                                                                                                                                                                                                                   |
| 46 | $\text{gol} + \text{NAD}^+ + \text{ATP} \leftrightarrow \text{G3P} + \text{NADH} + \text{H}^+ + \text{ADP} + \text{P}_i$                                                                                                                                                                                                                                                                                     |
| 47 | $\text{G6P} + 12 \text{NADP}^+ + 7 \text{H}_2\text{O} \rightarrow 6 \text{CO}_2 + 12 \text{NADPH} + 12 \text{H}^+ + \text{P}_i$                                                                                                                                                                                                                                                                              |
| 48 | $24 \text{arg} + 32 \text{asp} + 61 \text{ala} + 24 \text{ser} + 35 \text{cys} + 57 \text{glu} + 17 \text{gly} + 21 \text{tyr} + 33 \text{thr} + 53 \text{lys} + 26 \text{phe} + 25 \text{gln} + 30 \text{pro} + 15 \text{his} + 6 \text{met} + 20 \text{asn} + \text{trp} + 35 \text{val} + 13 \text{iso} + 56 \text{leu} + 2332 \text{ATP} \rightarrow \text{albumin} + 2332 \text{ADP} + 2332 \text{P}_i$ |
| 49 | $\text{glu} + 2 \text{ATP} + \text{cys} + \text{gly} + \text{NADPH} \rightarrow \text{GSH} + 2 \text{ADP} + 2 \text{P}_i + \text{NADP}^+ + \text{H}^+$                                                                                                                                                                                                                                                       |
| 50 | $\text{gol} + 3 \text{acCoA} + \text{H}_2\text{O} + \text{ATP} \rightarrow 3 \text{CoASH} + \text{P}_i + \text{TG} + \text{ADP} + \text{P}_i$                                                                                                                                                                                                                                                                |
| 51 | $\text{lactate} + \text{NAD}^+ \leftrightarrow \text{pyr} + \text{NADH} + \text{H}^+$                                                                                                                                                                                                                                                                                                                        |
| 52 | $\text{acac} + \text{NADH} + \text{H}^+ \leftrightarrow \beta\text{-OH-butyrate} + \text{NAD}^+$                                                                                                                                                                                                                                                                                                             |
| 53 | $\text{TG} + 3 \text{H}_2\text{O} \rightarrow \text{gol} + 3 \text{palm} + 3 \text{H}^+$                                                                                                                                                                                                                                                                                                                     |
| 54 | G6P release                                                                                                                                                                                                                                                                                                                                                                                                  |
| 55 | gol uptake                                                                                                                                                                                                                                                                                                                                                                                                   |
| 56 | palm release                                                                                                                                                                                                                                                                                                                                                                                                 |
| 57 | cholesterol ester + $\text{H}_2\text{O} \rightarrow$ cholesterol + palm                                                                                                                                                                                                                                                                                                                                      |
| 58 | TG stored                                                                                                                                                                                                                                                                                                                                                                                                    |
| 59 | trp uptake                                                                                                                                                                                                                                                                                                                                                                                                   |
| 60 | $\text{O}_2$ uptake                                                                                                                                                                                                                                                                                                                                                                                          |
| 61 | pro uptake                                                                                                                                                                                                                                                                                                                                                                                                   |
| 62 | glu secretion                                                                                                                                                                                                                                                                                                                                                                                                |
| 63 | asn uptake                                                                                                                                                                                                                                                                                                                                                                                                   |
| 64 | orn secretion                                                                                                                                                                                                                                                                                                                                                                                                |
| 65 | arg uptake                                                                                                                                                                                                                                                                                                                                                                                                   |
| 66 | $\text{NH}_4^+$ uptake                                                                                                                                                                                                                                                                                                                                                                                       |
| 67 | ala uptake                                                                                                                                                                                                                                                                                                                                                                                                   |
| 68 | ser uptake                                                                                                                                                                                                                                                                                                                                                                                                   |
| 69 | gly uptake                                                                                                                                                                                                                                                                                                                                                                                                   |
| 70 | asp uptake                                                                                                                                                                                                                                                                                                                                                                                                   |
| 71 | acac production                                                                                                                                                                                                                                                                                                                                                                                              |
| 72 | thr uptake                                                                                                                                                                                                                                                                                                                                                                                                   |
| 73 | lys uptake                                                                                                                                                                                                                                                                                                                                                                                                   |
| 74 | phe uptake                                                                                                                                                                                                                                                                                                                                                                                                   |
| 75 | his uptake                                                                                                                                                                                                                                                                                                                                                                                                   |
| 76 | met uptake                                                                                                                                                                                                                                                                                                                                                                                                   |
| 77 | val uptake                                                                                                                                                                                                                                                                                                                                                                                                   |
| 78 | iso uptake                                                                                                                                                                                                                                                                                                                                                                                                   |
| 79 | leu uptake                                                                                                                                                                                                                                                                                                                                                                                                   |
| 80 | gln uptake                                                                                                                                                                                                                                                                                                                                                                                                   |
| 81 | cys uptake                                                                                                                                                                                                                                                                                                                                                                                                   |
| 82 | tyr uptake                                                                                                                                                                                                                                                                                                                                                                                                   |

**Table S2:** List of metabolites

| No | Symbol                            | Metabolite                                                |
|----|-----------------------------------|-----------------------------------------------------------|
| 1  | <b>G6P</b>                        | Glucose-6-phosphate                                       |
| 2  | <b>F6P</b>                        | Fructose-6-phosphate                                      |
| 3  | <b>F16P2</b>                      | Fructose-1,6-biphosphate                                  |
| 4  | <b>G3P</b>                        | Glyceraldehyde-3-phosphate                                |
| 5  | <b>PEP</b>                        | Phosphoenolpyruvate                                       |
| 6  | <b>oac</b>                        | Oxaloacetate                                              |
| 7  | <b>pyr</b>                        | Pyruvate                                                  |
| 8  | <b>ctt</b>                        | Citrate                                                   |
| 9  | <b>akgl</b>                       | $\alpha$ -Ketoglutarate                                   |
| 10 | <b>sucCoA</b>                     | Succinyl-CoA                                              |
| 11 | <b>fum</b>                        | Fumarate                                                  |
| 12 | <b>mal</b>                        | Malate                                                    |
| 13 | <b>arg</b>                        | Arginine                                                  |
| 14 | <b>orn</b>                        | Ornithine                                                 |
| 15 | <b>ctr</b>                        | Citrulline                                                |
| 16 | <b>NH<sub>4</sub><sup>+</sup></b> | Ammonium                                                  |
| 17 | <b>asp</b>                        | Aspartate                                                 |
| 18 | <b>his</b>                        | Histidine                                                 |
| 19 | <b>glu</b>                        | Glutamate                                                 |
| 20 | <b>gln</b>                        | Glutamine                                                 |
| 21 | <b>met</b>                        | Methionine                                                |
| 22 | <b>thr</b>                        | Threonine                                                 |
| 23 | <b>val</b>                        | Valine                                                    |
| 24 | <b>iso</b>                        | Isoleucine                                                |
| 25 | <b>phe</b>                        | Phenylalanine                                             |
| 26 | <b>trp</b>                        | Tryptophan                                                |
| 27 | <b>lys</b>                        | Lysine                                                    |
| 28 | <b>tyr</b>                        | Tyrosine                                                  |
| 29 | <b>ala</b>                        | Alanine                                                   |
| 30 | <b>asn</b>                        | Asparagine                                                |
| 31 | <b>pro</b>                        | Proline                                                   |
| 32 | <b>cys</b>                        | Cysteine                                                  |
| 33 | <b>ser</b>                        | Serine                                                    |
| 34 | <b>gly</b>                        | Glycine                                                   |
| 35 | <b>propCoA</b>                    | Propionyl-CoA                                             |
| 36 | <b>acCoA</b>                      | Acetyl-CoA                                                |
| 37 | <b>palm</b>                       | Palmitate                                                 |
| 38 | <b>acacCoA</b>                    | Acetoacetyl-Coa                                           |
| 39 | <b>acac</b>                       | Acetoacetate                                              |
| 40 | <b>gol</b>                        | Glycerol                                                  |
| 41 | <b>NADH</b>                       | Nicotinamide adenine dinucleotide, reduced form           |
| 42 | <b>NADPH</b>                      | Nicotinamide adenine dinucleotide phosphate, reduced form |
| 43 | <b>FADH<sub>2</sub></b>           | Flavin adenine dinucleotide, reduced form                 |
| 44 | <b>O<sub>2</sub></b>              | Oxygen                                                    |
| 45 | <b>leu</b>                        | Leucine                                                   |
| 46 | <b>3Pglyc</b>                     | 3-phosphoglycerate                                        |
| 47 | <b>TG</b>                         | Triglyceride                                              |

**Table S3:** Lower and upper bounds for the metabolic network shown in Table S1.

| <b>Flux #</b> | <b>lower bound</b> | <b>upper bound</b> |
|---------------|--------------------|--------------------|
| 1             | 0.1                | 30                 |
| 2             | 0.00001            | 30                 |
| 3             | 0.00001            | 30                 |
| 4             | 0.00001            | 30                 |
| 5             | 0.00001            | 30                 |
| 6             | 0.00001            | 30                 |
| 7             | 0.00001            | 30                 |
| 8             | 5                  | 30                 |
| 9             | 5                  | 30                 |
| 10            | 5                  | 30                 |
| 11            | 5                  | 30                 |
| 12            | 5                  | 30                 |
| 13            | 5                  | 30                 |
| 14            | 5                  | 30                 |
| 15            | 0.00001            | 50                 |
| 16            | 0.00001            | 50                 |
| 17            | 0.00001            | 100                |
| 18            | -10                | 50                 |
| 19            | 0.1                | 50                 |
| 20            | 0.1                | 50                 |
| 21            | 0.01               | 50                 |
| 22            | 0.001              | 50                 |
| 23            | -1                 | 50                 |
| 24            | 0.001              | 50                 |
| 25            | 0.00001            | 50                 |
| 26            | 0.00001            | 50                 |
| 27            | 0.001              | 50                 |
| 28            | 0.1                | 50                 |
| 29            | 0.1                | 50                 |
| 30            | 0.1                | 50                 |
| 31            | 0.00001            | 50                 |
| 32            | 0.01               | 50                 |
| 33            | 0.01               | 50                 |
| 34            | 0.01               | 50                 |
| 35            | 0.01               | 50                 |
| 36            | -10                | 50                 |
| 37            | 0.00001            | 50                 |
| 38            | -10                | -0.01              |
| 39            | 0.00001            | 50                 |
| 40            | 0.1                | 50                 |
| 41            | 0.01               | 50                 |
| 42            | -10                | 50                 |
| 43            | 0.1                | 50                 |
| 44            | 5                  | 100                |
| 45            | 5                  | 100                |
| 46            | -10                | -0.001             |
| 47            | 0.01               | 10                 |

|    |         |     |
|----|---------|-----|
| 48 | 0.00001 | 5   |
| 49 | 0.001   | 50  |
| 50 | 0.001   | 50  |
| 51 | 10      | 50  |
| 52 | 0.15    | 20  |
| 53 | 0.1     | 50  |
| 54 | 1       | 10  |
| 55 | 0.01    | 5   |
| 56 | 0.01    | 5   |
| 57 | 0.01    | 5   |
| 58 | 0.01    | 2   |
| 59 | 0.5     | 2   |
| 60 | 5       | 100 |
| 61 | 0.01    | 5   |
| 62 | -1      | 5   |
| 63 | 0.0001  | 10  |
| 64 | -1      | 5   |
| 65 | 0.00001 | 10  |
| 66 | 0.1     | 20  |
| 67 | -1      | 5   |
| 68 | -1      | 5   |
| 69 | -1      | 5   |
| 70 | -1      | 10  |
| 71 | 0.001   | 10  |
| 72 | 0.01    | 10  |
| 73 | 0.01    | 10  |
| 74 | 0.01    | 5   |
| 75 | 0.01    | 5   |
| 76 | 0.01    | 5   |
| 77 | 0.01    | 5   |
| 78 | 0.01    | 5   |
| 79 | 0.00001 | 10  |
| 80 | 0.5     | 10  |
| 81 | 0.00001 | 10  |
| 82 | 0.00001 | 5   |

**Table S4:** Optimal fluxes obtained for the corresponding Pareto optimal points A, B, C, D, E, F, G, H as for Pareto frontiers shown in Figure 4.

| Flux # | Urea/Albumin    |                 | Albumin/NADPH |          | Urea/NADPH      |              | Albumin/GSH |          |
|--------|-----------------|-----------------|---------------|----------|-----------------|--------------|-------------|----------|
|        | A               | B               | C             | D        | E               | F            | G           | H        |
| 1      | 7.785957        | 9.62067         | 4.501296      | 4.445404 | 4.363114        | 7.905927     | 7.096188    | 5.82791  |
| 2      | 7.785957        | 9.62067         | 4.501296      | 4.445404 | 4.363114        | 7.905927     | 7.096188    | 5.82791  |
| 3      | 7.785957        | 9.62067         | 4.501296      | 4.445404 | 4.363114        | 7.905927     | 7.096188    | 5.82791  |
| 4      | 16.46149        | 20.34798        | 9.003593      | 8.891809 | 8.727229        | 16.61271     | 15.06206    | 12.47793 |
| 5      | 25.6859         | 27.44478        | 30            | 30       | 30              | 30           | 25.43381    | 24.53243 |
| 6      | 25.6859         | 27.44478        | 30            | 30       | 30              | 30           | 25.43381    | 24.53243 |
| 7      | 15.84174        | 17.02678        | 9.384746      | 12.57488 | 12.885          | 15.53424     | 17.34341    | 16.46248 |
| 8      | 3.43E-01        | 1.00E-05        | 24.86899      | 24.86899 | 2.12E+01        | 1.00E-05     | 2.582514    | 4.386691 |
| 9      | 9.890329        | 10.03176        | 5.115472      | 7.081859 | 5.01            | 5.534236     | 14.2609     | 14.92683 |
| 10     | 9.890329        | 10.03176        | 5.115472      | 7.081859 | 5.01            | 5.534236     | 14.2609     | 14.92683 |
| 11     | 5.194161        | 5               | 5             | 5        | 5               | 5            | 6.053049    | 7.008817 |
| 12     | 6.18233         | 5.031           | 5.031         | 5.031    | 5.031           | 5.031        | 13.05307    | 12.82959 |
| 13     | 29.39198        | 29.99999        | 5.13101       | 5.13101  | 8.806001        | 29.99999     | 25.1926     | 22.32604 |
| 14     | 29.73449        | 30              | 30            | 30       | 30              | 30           | 27.77511    | 26.71273 |
| 15     | 22.96323        | 24.86899        | 1.00E-05      | 1.00E-05 | 3.675001        | 24.86899     | 10.39242    | 8.387028 |
| 16     | 22.96323        | 24.86899        | 1.00E-05      | 1.00E-05 | 3.675001        | 24.86899     | 10.39242    | 8.387028 |
| 17     | <b>29.71549</b> | <b>34.57871</b> | 3.243832      | 2.912113 | <b>8.675011</b> | <b>33.35</b> | 15.15555    | 12.951   |
| 18     | -5.47035        | -0.20091        | -6.83422      | -9.20522 | -6.70001        | -4.42406     | 0.811111    | -5.22549 |
| 19     | 8.627798        | 6.250865        | 18.6902       | 19.6983  | 20.46381        | 9.858301     | 5.332216    | 5.966621 |
| 20     | 1.014155        | 0.335766        | 0.1           | 0.1      | 0.1             | 0.1          | 0.1         | 0.1      |
| 21     | 3.981159        | 6.082426        | 4.721405      | 3.962381 | 5.211021        | 4.76213      | 8.695423    | 5.09125  |
| 22     | 0.233951        | 0.001           | 0.001         | 0.001    | 0.001           | 0.001        | 0.35807     | 0.246111 |
| 23     | 0.868645        | -0.24599        | -0.22138      | 0.031534 | 0.24093         | -1           | -0.83939    | -0.88344 |
| 24     | 9.224414        | 7.096801        | 20.99641      | 21.10819 | 21.27277        | 13.38729     | 10.37175    | 12.0545  |
| 25     | 1.335851        | 1.022389        | 0.397835      | 0.359593 | 0.4             | 0.436709     | 1.077742    | 1.219174 |
| 26     | 0.98817         | 0.031           | 0.031         | 0.031    | 0.031           | 0.031        | 7.00002     | 5.820776 |
| 27     | 1.668952        | 2.513036        | 0.001         | 0.001    | 0.001           | 0.001        | 0.795249    | 0.870322 |
| 28     | 1.003804        | 0.242934        | 1.212868      | 0.750487 | 1.215752        | 0.957228     | 1.400862    | 0.974177 |
| 29     | 0.246424        | 0.1             | 0.1           | 0.1      | 0.1             | 0.1          | 1.747107    | 1.109419 |
| 30     | 0.529266        | 0.910025        | 0.128736      | 0.533352 | 0.1             | 0.1          | 2.606292    | 0.534704 |
| 31     | 1.792243        | 1.258018        | 3.467528      | 2.893898 | 3.499998        | 3.624568     | 2.249508    | 1.843529 |
| 32     | 0.403532        | 0.01            | 0.01          | 0.01     | 0.01            | 0.01         | 4.956447    | 4.188065 |
| 33     | 0.098037        | 0.01            | 0.01          | 0.01     | 0.01            | 0.01         | 0.681909    | 0.141935 |
| 34     | 0.25265         | 0.01            | 0.01          | 0.01     | 0.01            | 0.01         | 1.003594    | 1.244666 |
| 35     | 1.422942        | 2.600461        | 0.01          | 0.01     | 0.01            | 0.01         | 2.917282    | 1.243652 |
| 36     | -10             | -9.55023        | -4.26927      | -5.49302 | -7.875          | -10          | -5.42381    | -3.71595 |
| 37     | 7.293549        | 8.405977        | 1.00E-05      | 1.00E-05 | 1.00E-05        | 8.53E+00     | 3.464113    | 4.528196 |
| 38     | -4.69617        | -5.03176        | -0.11547      | -2.08186 | -0.01           | -0.53424     | -8.20785    | -7.91802 |
| 39     | 3.668984        | 5.12984         | 1.00E-05      | 1.00E-05 | 1.00E-05        | 3.48E+00     | 1.879397    | 3.332831 |
| 40     | 4.051254        | 1.644505        | 7.44588       | 6.48983  | 7.499996        | 8.182755     | 3.4557      | 4.688588 |
| 41     | 5.816694        | 5.333649        | 6.359092      | 6.567185 | 6.319222        | 6.518558     | 4.876678    | 5.827587 |
| 42     | 17.03733        | 16.63322        | 21.11767      | 20.73033 | 21.26558        | 21.2813      | 14.798      | 15.62067 |
| 43     | 20.04214        | 20.16865        | 21.51651      | 21.09092 | 21.66658        | 21.71901     | 16.67099    | 17.71017 |
| 44     | 65.76424        | 65.68775        | 67.2779       | 70.56428 | 64.22893        | 52.37466     | 72.58421    | 78.68357 |

|    |                 |                 |                 |                 |                 |                 |                 |                 |
|----|-----------------|-----------------|-----------------|-----------------|-----------------|-----------------|-----------------|-----------------|
| 45 | 51.67762        | 48.52243        | 49.97348        | 51.39189        | 49.69656        | 51.12861        | 53.66559        | 58.34245        |
| 46 | -0.88958        | -1.10664        | -0.001          | -0.001          | -0.001          | -0.80086        | -0.86968        | -0.82211        |
| 47 | 0.190351        | 0.114048        | <b>3.501296</b> | <b>3.445404</b> | <b>3.363114</b> | <b>1.057238</b> | 0.64292         | 0.609452        |
| 48 | <b>0.135323</b> | <b>0.012095</b> | <b>0.102165</b> | <b>0.140407</b> | 0.1             | 0.063291        | <b>0.007259</b> | <b>0.135323</b> |
| 49 | 3.421764        | 8.829958        | 6.334232        | 4.995762        | 6.409994        | 7.694808        | <b>14.60239</b> | <b>9.351776</b> |
| 50 | 2.74177         | 2.687956        | 2.75444         | 2.659113        | 2.747878        | 2.944586        | 2.590945        | 2.677365        |
| 51 | 12.01265        | 10.64107        | 22.29775        | 26.85079        | 20.2152         | 10              | 13.6826         | 20.00803        |
| 52 | 15.36006        | 16.1376         | 15.37013        | 14.95023        | 15.45666        | 15.46315        | 15.2931         | 14.41204        |
| 53 | 1.127345        | 1.03384         | 1.323725        | 1.260914        | 1.309268        | 1.362648        | 0.920916        | 1.057511        |
| 54 | 7.595606        | 9.506622        | 1               | 1               | 1               | 6.848688        | 6.453268        | 5.218458        |
| 55 | 0.724848        | 0.547474        | 1.429715        | 1.3972          | 1.43761         | 0.781081        | 0.800344        | 0.797747        |
| 56 | 1.217329        | 1.116065        | 1.193958        | 1.392222        | 1.19571         | 1.215308        | 1.056965        | 1.327528        |
| 57 | 1.217329        | 1.116065        | 1.193958        | 1.392222        | 1.19571         | 1.215308        | 1.056965        | 1.327528        |
| 58 | 1.614424        | 1.654116        | 1.430715        | 1.3982          | 1.43861         | 1.581938        | 1.670028        | 1.619854        |
| 59 | 1.471173        | 1.034485        | 0.5             | 0.5             | 0.5             | 0.5             | 1.085001        | 1.354496        |
| 60 | 64.48977        | 61.0702         | 61.29643        | 63.27402        | 59.6285         | 54.26899        | 72.55635        | 75.6309         |
| 61 | 4.588942        | 1.272878        | 3.19368         | 4.745555        | 3.100005        | 1.998736        | 2.824059        | 4.59438         |
| 62 | 3.602765        | 4.454768        | -1              | -1              | -1              | 4.620163        | 3.382605        | 1.252508        |
| 63 | 10              | 8.64788         | 2.043306        | 2.808146        | 2.000013        | 9.799933        | 3.609291        | 7.234647        |
| 64 | 3.083275        | 4.579877        | 3.243812        | 2.912093        | 5               | 5               | 2.883732        | 1.231142        |
| 65 | 10              | 10              | 5.695777        | 6.281866        | 7.400014        | 10              | 4.937343        | 7.811715        |
| 66 | 17.70624        | 15.18979        | 2.192294        | 8.172124        | 7.185027        | 19.85412        | 3.610539        | 6.59099         |
| 67 | 1.448473        | -0.4855         | -1              | -1              | -1              | -1              | 0.176161        | 1.810015        |
| 68 | 2.186011        | -0.29966        | 0.377123        | 1.938337        | 1.36011         | -1              | 0.930517        | 2.231371        |
| 69 | 3.478377        | 2.461166        | 2.906876        | 3.483364        | 3.380838        | 2.008629        | 4.351577        | 4.794124        |
| 70 | 10              | 7.299824        | -1              | -1              | -1              | 8.360199        | 1.736781        | 4.473204        |
| 71 | 6.351441        | 6.731517        | 6.256377        | 6.250692        | 6.319921        | 6.365859        | 6.042277        | 5.651198        |
| 72 | 8.680754        | 6.482565        | 8.093844        | 8.596805        | 8.512026        | 6.85174         | 9.293036        | 9.803005        |
| 73 | 8.841047        | 3.154078        | 5.415735        | 7.44256         | 5.301009        | 3.355434        | 1.17997         | 8.042417        |
| 74 | 4.522191        | 0.557407        | 3.869153        | 4.401063        | 3.815757        | 2.602799        | 1.589593        | 4.492563        |
| 75 | 3.822081        | 1.439445        | 5               | 5               | 5               | 4.573936        | 2.358391        | 3.873367        |
| 76 | 1.215467        | 0.082571        | 0.622989        | 0.852441        | 0.610001        | 0.389747        | 5               | 5               |
| 77 | 4.834326        | 0.433329        | 3.585768        | 4.924238        | 3.510006        | 2.225192        | 0.93597         | 4.878224        |
| 78 | 2.011843        | 0.167237        | 1.338142        | 1.835288        | 1.310002        | 0.832786        | 1.09796         | 3.003859        |
| 79 | 9.001005        | 3.277789        | 5.731229        | 7.87278         | 5.610009        | 3.554308        | 3.323779        | 8.821715        |
| 80 | 7.434318        | 1.946883        | 10              | 10              | 10              | 9.765035        | 3.637172        | 8.071652        |
| 81 | 8.768677        | 9.579053        | 10              | 10              | 10              | 10              | 10              | 10              |
| 82 | 2.084393        | 0.111064        | 1.032593        | 2.298056        | 0.984251        | 0.471887        | 0.498681        | 2.977015        |

**Table S5:** Optimal fluxes obtained for tri-objective system for the corresponding Pareto optimal cases 3, 4 and 5 from Table I, and cases 3, 5 and 6 from Table II.

| Flux # | NADPH/Albumin/GSH |        |        |        |        | Urea/NADPH/Albumin |         |         |        |        |        |
|--------|-------------------|--------|--------|--------|--------|--------------------|---------|---------|--------|--------|--------|
|        | Case 1            | Case 2 | Case 3 | Case 4 | Case 5 | Case 1             | Case 2  | Case 3  | Case 4 | Case 5 | Case 6 |
| 1      | 4.324             | 4.442  | 1.767  | 4.504  | 9.059  | 3.278              | 10.100  | 10.311  | 4.442  | 4.504  | 1.515  |
| 2      | 4.324             | 4.442  | 1.767  | 4.504  | 9.059  | 3.278              | 10.100  | 10.311  | 4.442  | 4.504  | 1.515  |
| 3      | 4.324             | 4.442  | 1.767  | 4.504  | 9.059  | 3.278              | 10.100  | 10.311  | 4.442  | 4.504  | 1.515  |
| 4      | 8.650             | 8.885  | 3.534  | 9.010  | 18.119 | 6.557              | 20.201  | 22.494  | 8.885  | 9.010  | 3.031  |
| 5      | 30.000            | 30.000 | 4.310  | 30.000 | 19.237 | 30.000             | 21.245  | 24.628  | 30.000 | 30.000 | 3.552  |
| 6      | 30.000            | 30.000 | 4.310  | 30.000 | 19.237 | 30.000             | 21.245  | 24.628  | 30.000 | 30.000 | 3.552  |
| 7      | 14.395            | 12.589 | 3.108  | 9.210  | 10.077 | 15.010             | 6.255   | 9.638   | 12.589 | 9.210  | 2.252  |
| 8      | 20.533            | 24.869 | 1.144  | 24.869 | 0.000  | 8.019              | 0.229   | 0.000   | 24.869 | 24.869 | 0.779  |
| 9      | 9.906             | 7.027  | 5.010  | 5.010  | 10.923 | 5.010              | 5.010   | 5.010   | 7.027  | 5.010  | 5.178  |
| 10     | 9.906             | 7.027  | 5.010  | 5.010  | 10.923 | 5.010              | 5.010   | 5.010   | 7.027  | 5.010  | 5.178  |
| 11     | 5.000             | 5.000  | 5.000  | 5.000  | 5.000  | 5.000              | 5.000   | 5.000   | 5.000  | 5.000  | 5.000  |
| 12     | 9.367             | 5.031  | 6.359  | 5.031  | 10.015 | 5.031              | 6.714   | 5.031   | 5.031  | 5.031  | 6.196  |
| 13     | 9.467             | 5.131  | 6.459  | 5.131  | 17.707 | 21.981             | 29.771  | 30.000  | 5.131  | 5.131  | 6.623  |
| 14     | 30.000            | 30.000 | 7.603  | 30.000 | 17.707 | 30.000             | 30.000  | 30.000  | 30.000 | 30.000 | 7.402  |
| 15     | 0.000             | 0.000  | 0.000  | 0.000  | 7.592  | 16.850             | 22.957  | 24.869  | 0.000  | 0.000  | 0.328  |
| 16     | 0.000             | 0.000  | 0.000  | 0.000  | 7.592  | 16.850             | 22.957  | 24.869  | 0.000  | 0.000  | 0.328  |
| 17     | 0.000             | 0.593  | 0.000  | 0.351  | 7.772  | 23.724             | 29.706  | 34.845  | 1.000  | 4.393  | 1.000  |
| 18     | -7.260            | -9.339 | -7.537 | -6.700 | -0.562 | -8.574             | -8.897  | -0.562  | -9.339 | -6.700 | -8.095 |
| 19     | 12.946            | 24.158 | 0.100  | 18.869 | 0.100  | 20.204             | 0.100   | 0.100   | 18.158 | 18.869 | 0.100  |
| 20     | 0.100             | 0.100  | 0.279  | 0.100  | 0.100  | 0.100              | 5.281   | 0.100   | 0.100  | 0.100  | 0.202  |
| 21     | 6.401             | 5.294  | 1.821  | 5.687  | 7.876  | 1.145              | 2.232   | 2.892   | 5.294  | 6.699  | 2.162  |
| 22     | 0.001             | 0.001  | 0.001  | 0.001  | 0.001  | 0.001              | 0.001   | 0.001   | 0.001  | 0.001  | 0.079  |
| 23     | -0.441            | 1.475  | -0.916 | 1.289  | -1.000 | -1.000             | -1.000  | -1.000  | 1.475  | 1.289  | -0.903 |
| 24     | 21.350            | 21.115 | 0.776  | 20.990 | 1.118  | 23.443             | 1.044   | 2.134   | 21.115 | 20.990 | 0.521  |
| 25     | 0.391             | 0.357  | 0.570  | 0.400  | 0.499  | 0.370              | 0.365   | 0.499   | 0.357  | 0.400  | 0.572  |
| 26     | 4.367             | 0.031  | 1.359  | 0.031  | 5.015  | 0.031              | 1.714   | 0.031   | 0.031  | 0.031  | 1.196  |
| 27     | 0.001             | 0.001  | 0.001  | 0.001  | 0.001  | 0.001              | 0.001   | 0.001   | 0.001  | 0.001  | 0.001  |
| 28     | 2.165             | 0.100  | 1.293  | 0.100  | 0.121  | 1.614              | 1.478   | 0.100   | 1.293  | 1.524  | 1.293  |
| 29     | 0.100             | 0.100  | 0.100  | 0.100  | 0.100  | 0.100              | 0.100   | 0.100   | 0.100  | 0.100  | 0.100  |
| 30     | 0.100             | 0.723  | 0.100  | 0.100  | 0.100  | 0.100              | 0.937   | 0.100   | 0.723  | 0.100  | 0.100  |
| 31     | 3.365             | 2.861  | 2.861  | 3.500  | 3.949  | 3.047              | 2.497   | 4.985   | 2.861  | 3.500  | 2.861  |
| 32     | 4.346             | 0.010  | 1.338  | 0.010  | 4.994  | 0.010              | 1.693   | 0.010   | 0.010  | 0.010  | 1.097  |
| 33     | 0.010             | 0.010  | 0.010  | 0.010  | 0.010  | 0.010              | 0.010   | 0.010   | 0.010  | 0.010  | 0.010  |
| 34     | 0.010             | 0.010  | 0.010  | 0.010  | 0.010  | 0.010              | 0.010   | 0.010   | 0.010  | 0.010  | 0.010  |
| 35     | 0.010             | 0.010  | 0.010  | 0.010  | 0.010  | 0.010              | 0.010   | 4.692   | 0.010  | 0.010  | 0.010  |
| 36     | -4.489            | -5.562 | -1.391 | -4.200 | 2.376  | -10.000            | -10.000 | -10.000 | -5.562 | -4.200 | -0.924 |
| 37     | 0.000             | 0.000  | 0.179  | 0.000  | 0.000  | 7.395              | 7.291   | 8.277   | 0.000  | 0.000  | 0.279  |
| 38     | -4.906            | -2.027 | -0.010 | -0.010 | -5.923 | -0.010             | -0.010  | -0.010  | -2.027 | -0.010 | -0.178 |



|    |               |              |              |              |               |              |              |              |              |              |              |
|----|---------------|--------------|--------------|--------------|---------------|--------------|--------------|--------------|--------------|--------------|--------------|
| 39 | 0.000         | 0.000        | 0.000        | 0.000        | 0.000         | 1.874        | 1.749        | 4.976        | 0.000        | 0.000        | 0.000        |
| 40 | 7.274         | 6.436        | 4.619        | 7.500        | 3.944         | 6.744        | 6.614        | 4.861        | 6.436        | 7.500        | 4.943        |
| 41 | 1.877         | 0.320        | 0.320        | 0.320        | 0.320         | 1.009        | 0.320        | 0.320        | 0.320        | 0.863        | 0.320        |
| 42 | 4.822         | -0.258       | -0.471       | -0.301       | -0.400        | 0.332        | -0.266       | -0.400       | -0.113       | 1.006        | -0.384       |
| 43 | 5.214         | 0.100        | 0.100        | 0.100        | 0.100         | 0.703        | 0.100        | 0.100        | 0.245        | 1.407        | 0.189        |
| 44 | 61.189        | 40.056       | 21.924       | 42.297       | 28.042        | 29.011       | 25.861       | 32.001       | 46.115       | 47.166       | 21.711       |
| 45 | 22.930        | 7.659        | 9.200        | 7.702        | 12.785        | 12.495       | 9.350        | 12.483       | 7.659        | 11.500       | 9.039        |
| 46 | -0.001        | -0.001       | -0.001       | -0.001       | -0.001        | -0.001       | -0.001       | -1.871       | -0.001       | -0.001       | -0.001       |
| 47 | <b>3.324</b>  | <b>3.442</b> | <b>0.100</b> | <b>3.504</b> | <b>0.532</b>  | <b>2.278</b> | <b>0.100</b> | <b>0.311</b> | <b>3.442</b> | <b>3.504</b> | <b>0.100</b> |
| 48 | <b>0.109</b>  | <b>0.143</b> | <b>0.143</b> | <b>0.100</b> | <b>0.001</b>  | <b>0.130</b> | <b>0.135</b> | <b>0.001</b> | <b>0.143</b> | <b>0.100</b> | <b>0.143</b> |
| 49 | <b>10.430</b> | <b>4.920</b> | <b>0.464</b> | <b>6.410</b> | <b>14.859</b> | 5.352        | 0.929        | 9.875        | 4.920        | 6.410        | 0.957        |
| 50 | 0.630         | 0.455        | 0.111        | 1.286        | 0.111         | 1.188        | 0.111        | 1.981        | 0.358        | 2.200        | 0.111        |
| 51 | 29.142        | 22.539       | 11.411       | 21.810       | 10.439        | 11.299       | 10.000       | 10.000       | 28.539       | 21.810       | 10.825       |
| 52 | 0.150         | 0.209        | 0.209        | 0.209        | 0.209         | 0.150        | 0.209        | 0.150        | 0.150        | 0.150        | 0.298        |
| 53 | 0.619         | 0.100        | 0.100        | 0.100        | 0.100         | 0.330        | 0.100        | 0.100        | 0.100        | 0.281        | 0.100        |
| 54 | 1.000         | 1.000        | 1.667        | 1.000        | 8.527         | 1.000        | 10.000       | 10.000       | 1.000        | 1.000        | 1.415        |
| 55 | 0.010         | 0.354        | 0.010        | 1.185        | 0.010         | 0.857        | 0.010        | 0.010        | 0.257        | 1.918        | 0.010        |
| 56 | 0.010         | 0.010        | 0.010        | 0.010        | 0.010         | 0.010        | 0.010        | 0.010        | 0.010        | 0.010        | 0.010        |
| 57 | 0.010         | 0.010        | 0.010        | 0.010        | 0.010         | 0.010        | 0.010        | 0.010        | 0.010        | 0.010        | 0.010        |
| 58 | 0.011         | 0.355        | 0.011        | 1.186        | 0.011         | 0.858        | 0.011        | 1.881        | 0.258        | 1.919        | 0.011        |
| 59 | 0.500         | 0.500        | 0.713        | 0.500        | 0.500         | 0.500        | 0.500        | 0.500        | 0.500        | 0.500        | 0.715        |
| 60 | 45.648        | 25.592       | 18.815       | 26.549       | 22.281        | 23.726       | 20.846       | 24.089       | 29.814       | 32.307       | 18.635       |
| 61 | 3.371         | 5.000        | 4.377        | 3.100        | 0.130         | 4.007        | 5.000        | 0.130        | 5.000        | 3.100        | 4.377        |
| 62 | -1.000        | -1.000       | -1.000       | -1.000       | -1.000        | -1.000       | 3.157        | 5.000        | -1.000       | -1.000       | -1.000       |
| 63 | 2.181         | 2.851        | 3.031        | 2.000        | 0.020         | 10.000       | 10.000       | 8.297        | 2.851        | 2.000        | 3.131        |
| 64 | 0.000         | 0.593        | 0.000        | 0.351        | 0.180         | 5.000        | 5.000        | 5.000        | 1.000        | 4.393        | 0.672        |
| 65 | 2.617         | 4.015        | 3.422        | 2.751        | 0.204         | 10.000       | 10.000       | 10.000       | 4.422        | 6.793        | 4.094        |
| 66 | 9.891         | 2.512        | 0.550        | 0.100        | 0.100         | 20.000       | 18.185       | 9.951        | 8.512        | 0.100        | 0.683        |
| 67 | -1.000        | -1.000       | 0.590        | -1.000       | -1.000        | -1.000       | -1.000       | -1.000       | -1.000       | -1.000       | 0.029        |
| 68 | -1.000        | 5.000        | 5.000        | -1.000       | 5.000         | 0.897        | 5.000        | -1.000       | -1.000       | -1.000       | 5.000        |
| 69 | 5.000         | 5.000        | -0.766       | 5.000        | 5.000         | 4.420        | -1.000       | 5.000        | 5.000        | 3.988        | -0.587       |
| 70 | -1.000        | -1.000       | 2.992        | -1.000       | 10.000        | 3.622        | 10.000       | 6.624        | -1.000       | -1.000       | 3.687        |
| 71 | 5.174         | 0.001        | 0.001        | 0.001        | 0.001         | 0.663        | 0.001        | 4.742        | 0.205        | 1.367        | 0.001        |
| 72 | 10.000        | 10.000       | 6.527        | 8.988        | 7.910         | 5.444        | 6.703        | 2.926        | 10.000       | 10.000       | 6.946        |
| 73 | 5.780         | 7.557        | 7.557        | 5.301        | 0.054         | 6.903        | 7.179        | 0.054        | 7.557        | 5.301        | 7.557        |
| 74 | 5.000         | 3.807        | 5.000        | 2.700        | 0.147         | 5.000        | 5.000        | 0.126        | 5.000        | 4.124        | 5.000        |
| 75 | 5.000         | 5.000        | 5.000        | 5.000        | 3.964         | 5.000        | 4.528        | 5.000        | 5.000        | 5.000        | 5.000        |
| 76 | 5.000         | 0.865        | 2.193        | 0.610        | 5.000         | 0.791        | 2.506        | 0.016        | 0.865        | 0.610        | 1.952        |
| 77 | 3.826         | 5.000        | 5.000        | 3.510        | 0.045         | 4.568        | 4.751        | 0.045        | 5.000        | 3.510        | 5.000        |
| 78 | 1.427         | 1.863        | 1.863        | 1.310        | 0.023         | 1.703        | 1.771        | 0.023        | 1.863        | 1.310        | 1.863        |
| 79 | 6.116         | 7.994        | 7.994        | 5.610        | 0.066         | 7.303        | 7.595        | 4.748        | 7.994        | 5.610        | 7.994        |

|    |        |        |       |        |        |        |        |        |        |        |       |
|----|--------|--------|-------|--------|--------|--------|--------|--------|--------|--------|-------|
| 80 | 10.000 | 10.000 | 8.184 | 10.000 | 3.969  | 10.000 | 10.000 | 4.886  | 10.000 | 10.000 | 8.508 |
| 81 | 10.000 | 10.000 | 4.396 | 10.000 | 10.000 | 10.000 | 9.258  | 10.000 | 10.000 | 10.000 | 5.051 |
| 82 | 0.224  | 2.994  | 1.801 | 2.100  | 0.000  | 1.221  | 1.466  | 0.021  | 1.801  | 0.676  | 1.801 |

**Table S6:** Optimal fluxes obtained for quad-objective system (Table III). These solutions are compared in Figure 6 with two different base cases which consider 10 measured fluxes (pink cells): the first one is obtained by one-variable optimization of flux 48 given measured values for fluxes 16, 46 and 47 (yellow cells). The second one is obtained by quad-optimization of the target fluxes using LPP.

| Flux # | Case 1 (Base) | Case 2 (Base) | Case 3     | Case 4     | Case 5     | Case 6     | Case 7     |
|--------|---------------|---------------|------------|------------|------------|------------|------------|
| 1      | 6.6906189     | 4.7288333     | 9.4274226  | 4.5044601  | 1.9477056  | 9.1841297  | 3.2778991  |
| 2      | 6.6906189     | 4.7288333     | 9.4274226  | 4.5044601  | 1.9477056  | 9.1841297  | 3.2778991  |
| 3      | 6.6906189     | 4.7288333     | 9.4274226  | 4.5044601  | 1.9477056  | 9.1841297  | 3.2778991  |
| 4      | 13.711238     | 9.7876667     | 18.855845  | 9.0099203  | 3.8964111  | 18.369259  | 6.5567982  |
| 5      | 22.33912      | 30            | 18.856845  | 30         | 4.6972809  | 21.322122  | 30         |
| 6      | 22.33912      | 30            | 18.856845  | 30         | 4.6972809  | 21.322122  | 30         |
| 7      | 21.575667     | 15.01         | 9.63799    | 9.2100052  | 3.475044   | 10.319553  | 17.211714  |
| 8      | 5.1139258     | 14.843        | 1.00E-05   | 24.86899   | 1.151404   | 1.00E-05   | 5.2624954  |
| 9      | 20.1804       | 5.01          | 10.781145  | 5.01       | 5.01       | 9.0804507  | 7.2117143  |
| 10     | 20.1804       | 5.01          | 10.781145  | 5.01       | 5.01       | 9.0804507  | 7.2117143  |
| 11     | 10.536547     | 5             | 5          | 5          | 5          | 5          | 5          |
| 12     | 13.825754     | 5.033         | 5.031      | 5.031      | 6.3771852  | 10.015     | 9.3901214  |
| 13     | 15.722608     | 15.157        | 29.99999   | 5.13101    | 6.7841162  | 18.968961  | 24.737505  |
| 14     | 20.836534     | 30            | 30         | 30         | 7.9355202  | 18.968971  | 30         |
| 15     | 0.2329293     | 10.016        | 24.86899   | 1.00E-05   | 0.306931   | 8.8539613  | 15.247383  |
| 16     | 0.2329293     | 10.016        | 24.86899   | 1.00E-05   | 0.306931   | 8.8539613  | 15.247383  |
| 17     | 0.57          | 20            | 34.84499   | 1          | 1          | 8.8299713  | 22.723869  |
| 18     | 0.89722       | 0.6986667     | -0.562     | -6.70001   | -7.2308102 | -0.562     | -7.0190786 |
| 19     | 7.5658138     | 19.054333     | 0.1        | 21.157091  | 0.1        | 0.781563   | 19.393288  |
| 20     | 0.1           | 0.1           | 0.1        | 0.1        | 0.2298384  | 0.1        | 0.1        |
| 21     | 6.841406      | 8.9           | 5.710555   | 1.1099971  | 1.6074467  | 7.876      | 6.5291678  |
| 22     | 0.5215514     | 0.001         | 0.001      | 0.001      | 0.001      | 0.001      | 0.001      |
| 23     | -0.9143768    | -1            | -0.26477   | -1         | -0.9229703 | -1         | -0.4236589 |
| 24     | 8.6278826     | 20.212333     | 0.001      | 20.99008   | 0.8008698  | 2.9528628  | 23.443202  |
| 25     | 0.662954      | 0.4993333     | 0.499      | 0.3999998  | 0.4992014  | 0.499      | 0.3948536  |
| 26     | 3.2892067     | 0.033         | 0.031      | 0.031      | 1.3771852  | 5.015      | 4.3901214  |
| 27     | 0.3315745     | 0.001         | 1.0127948  | 0.001      | 0.001      | 0.001      | 0.001      |
| 28     | 1.643899      | 0.1           | 0.1        | 0.1        | 1.2931429  | 0.1        | 0.1        |
| 29     | 1.663925      | 0.108         | 0.1        | 0.1        | 0.1        | 0.1        | 0.1        |
| 30     | 0.11718       | 0.1           | 0.1        | 0.1        | 0.1        | 0.1078961  | 0.1        |
| 31     | 0.9463588     | 4.918         | 1.8306575  | 3.4999976  | 2.8614286  | 4.8663216  | 3.4228036  |
| 32     | 0.015436      | 0.012         | 0.01       | 0.01       | 1.3561852  | 4.994      | 4.3691214  |
| 33     | 1.1775832     | 0.01          | 0.01       | 0.01       | 0.01       | 0.01       | 0.01       |
| 34     | 1.5746361     | 0.01          | 0.01       | 0.01       | 0.01       | 0.01       | 0.01       |
| 35     | 0.9442141     | 0.01          | 0.01       | 0.01       | 0.01       | 0.01       | 0.01       |
| 36     | 0.1073195     | -10           | -10        | -4.2000052 | -1.7032833 | 1.1140487  | -10        |
| 37     | 0.3372568     | 0.0313333     | 9.98       | 1.00E-05   | 0.3797766  | 1.00E-05   | 0.6841449  |
| 38     | -9.6438525    | -0.01         | -5.7811447 | -0.01      | -0.01      | -4.0804507 | -2.2117143 |
| 39     | 0.3807133     | 4.984         | 4.976      | 1.00E-05   | 1.00E-05   | 1.00E-05   | 2.4764857  |
| 40     | 1.499408      | 4.9146667     | 1.8256575  | 7.499996   | 4.5716765  | 4.8613216  | 7.3713393  |
| 41     | 5.3582785     | 0.69          | 0.32       | 0.4701433  | 0.3643938  | 0.32       | 0.3306194  |
| 42     | 12.698394     | 3.32          | -1.4117948 | -0.3009998 | -0.4002014 | 0.5212746  | 0.8193946  |
| 43     | 13.692923     | 3.8203333     | 0.1        | 0.1        | 0.1        | 1.0212746  | 1.2152482  |
| 44     | 69.068162     | 35.771167     | 37.279842  | 34.193956  | 21.868999  | 27.069763  | 32.461969  |
| 45     | 56.024665     | 10.393333     | 8.8127948  | 8.7530031  | 9.4581432  | 12.785     | 12.130311  |
| 46     | -0.33         | -0.33         | -0.001     | -0.001     | -0.001     | -0.001     | -0.001     |
| 47     | 0.012         | 2.4441667     | 0.1        | 3.5044601  | 0.1        | 0.7374778  | 2.2778991  |
| 48     | 9.40E-05      | 0.0006667     | 0.001      | 0.1000002  | 0.1425714  | 0.001      | 0.1051464  |
| 49     | 9.912146      | 9.8886667     | 9.4564598  | 6.4099944  | 0.4165436  | 14.859     | 10.588996  |

|    |            |           |           |           |            |           |           |
|----|------------|-----------|-----------|-----------|------------|-----------|-----------|
| 50 | 2.2164321  | 0.93      | 0.111     | 0.1610478 | 0.111      | 0.111     | 0.1145398 |
| 51 | 18.126558  | 10        | 10        | 19.521914 | 11.52742   | 10        | 10        |
| 52 | 16.171062  | 3.8083333 | 0.15      | 0.209     | 0.209      | 1.1302746 | 1.3242482 |
| 53 | 1.3864321  | 0.1       | 0.1       | 0.1500478 | 0.1        | 0.1       | 0.1035398 |
| 54 | 6.6786189  | 2.2846667 | 9.3274226 | 1         | 1.8477056  | 8.4466519 | 1         |
| 55 | 0.5        | 0.5       | 0.01      | 0.01      | 0.01       | 0.01      | 0.01      |
| 56 | 0.8189823  | 0.01      | 0.01      | 0.01      | 0.0321969  | 0.01      | 0.01      |
| 57 | 0.38       | 0.38      | 0.01      | 0.01      | 0.0321969  | 0.01      | 0.01      |
| 58 | 0.83       | 0.83      | 0.011     | 0.011     | 0.011      | 0.011     | 0.011     |
| 59 | 0.663048   | 0.5       | 0.5       | 0.5       | 0.6417729  | 0.5       | 0.5       |
| 60 | 69.565615  | 24.94625  | 24.893318 | 23.023479 | 18.704318  | 21.778329 | 23.8307   |
| 61 | 0.12       | 0.12      | 0.13      | 3.1000048 | 4.3771429  | 0.1378961 | 3.2543929 |
| 62 | 2.6700085  | 5         | 5         | -1        | -1         | -1        | -1        |
| 63 | 0.3391368  | 0.0446667 | 10        | 2.0000132 | 3.2312052  | 0.02001   | 2.7870735 |
| 64 | -0.0436426 | 5         | 5         | 0.99998   | 0.693059   | -0.024    | 5         |
| 65 | 0.3393267  | 10        | 10        | 3.3999939 | 4.1147833  | 1.00E-05  | 10        |
| 66 | 0.3615021  | 5.885     | 20        | 0.1       | 0.8437478  | 0.1       | 20        |
| 67 | 0.24       | 0.24      | -1        | -1        | 0.9668455  | -1        | -1        |
| 68 | -0.13      | -0.13     | 0.39777   | 3.5770156 | 5          | 3.8467002 | 3.2663812 |
| 69 | 1.2435843  | -1        | 3.2333647 | 5         | -0.6131293 | 5         | 5         |
| 70 | 0.006      | 0.006     | 4.92099   | -1        | 2.7861569  | 10        | 7.9279239 |
| 71 | 0.13       | 0.13      | 0.06      | 0.001     | 0.001      | 0.001     | 0.001     |
| 72 | 7.3660594  | 8.923     | 5.744555  | 4.4110024 | 6.3133039  | 7.91      | 10        |
| 73 | 0.3365565  | 0.0363333 | 1.0657948 | 5.3010085 | 7.5572857  | 0.054     | 5.5737607 |
| 74 | 1.646343   | 0.1173333 | 0.126     | 2.7000042 | 5          | 0.126     | 2.8338072 |
| 75 | 0.9477688  | 4.928     | 1.8456575 | 5         | 5          | 4.8813216 | 5         |
| 76 | 0.016      | 0.016     | 0.016     | 0.610001  | 2.2116138  | 5         | 5         |
| 77 | 1.1808732  | 0.0333333 | 0.045     | 3.5100056 | 5          | 0.045     | 3.690125  |
| 78 | 1.5758581  | 0.0186667 | 0.023     | 1.3100021 | 1.8634286  | 0.023     | 1.3769036 |
| 79 | 0.9494781  | 0.0473333 | 0.066     | 5.610009  | 7.994      | 0.066     | 5.8982    |
| 80 | 1.501758   | 4.9313333 | 1.8506575 | 10        | 8.1359622  | 4.8863216 | 10        |
| 81 | 10         | 10        | 9.5814598 | 10        | 4.2801969  | 10        | 10        |
| 82 | 0.022      | 0.022     | 0.021     | 2.1000034 | 1.8008571  | 0.021     | 2.208075  |

**Table S7:** Optimal fluxes obtained for quad-objective system. These solutions are compared in Figure 6 with two different base cases which consider 10 measured fluxes (pink cells): the first one is obtained by one-variable optimization of flux 48 given measured values for fluxes 16, 46 and 47 (yellow cells). The second one is obtained by quad-optimization of the target fluxes using LPP.

| Flu x | Case 1 | Case 2 | Case 3 | Case 4 | Case 5 | Case 6 | Case 7 | Case 8 | Case 9 | Case 10 | Case 11 | Case 12 | Case 13 | Case 14 | Case 15 | Case 16 | Opt of GSH | Quad-obj opt |
|-------|--------|--------|--------|--------|--------|--------|--------|--------|--------|---------|---------|---------|---------|---------|---------|---------|------------|--------------|
| #     | (Base) | (Base) |        |        |        |        |        |        |        |         |         |         |         |         |         |         |            |              |
| 1     | 6.691  | 4.729  | 9.427  | 4.504  | 1.948  | 9.184  | 3.278  | 3.278  | 3.358  | 3.278   | 8.658   | 10.100  | 10.100  | 4.329   | 4.442   | 4.221   | 3.761      | 4.201        |
| 2     | 6.691  | 4.729  | 9.427  | 4.504  | 1.948  | 9.184  | 3.278  | 3.278  | 3.358  | 3.278   | 8.658   | 10.100  | 10.100  | 4.329   | 4.442   | 4.221   | 3.761      | 4.201        |
| 3     | 6.691  | 4.729  | 9.427  | 4.504  | 1.948  | 9.184  | 3.278  | 3.278  | 3.358  | 3.278   | 8.658   | 10.100  | 10.100  | 4.329   | 4.442   | 4.221   | 3.761      | 4.201        |
| 4     | 13.711 | 9.788  | 18.856 | 9.010  | 3.896  | 18.369 | 6.557  | 6.557  | 6.717  | 6.557   | 17.317  | 20.201  | 20.201  | 8.660   | 8.885   | 8.442   | 7.522      | 8.404        |
| 5     | 22.339 | 30.000 | 18.857 | 30.000 | 4.697  | 21.322 | 30.000 | 30.000 | 30.000 | 30.000  | 21.144  | 20.202  | 23.692  | 30.000  | 30.000  | 30.000  | 9.938      | 8.751        |
| 6     | 22.339 | 30.000 | 18.857 | 30.000 | 4.697  | 21.322 | 30.000 | 30.000 | 30.000 | 30.000  | 21.144  | 20.202  | 23.692  | 30.000  | 30.000  | 30.000  | 9.938      | 8.751        |
| 7     | 21.576 | 15.010 | 9.638  | 9.210  | 3.475  | 10.320 | 17.212 | 15.010 | 15.010 | 15.010  | 10.591  | 6.846   | 9.638   | 12.307  | 12.589  | 11.047  | 3.181      | 9.489        |
| 8     | 5.114  | 14.843 | 0.000  | 24.869 | 1.151  | 0.000  | 5.262  | 8.019  | 5.785  | 8.987   | 0.000   | 0.000   | 0.000   | 20.510  | 24.869  | 14.880  | 0.000      | 0.533        |
| 9     | 20.180 | 5.010  | 10.781 | 5.010  | 5.010  | 9.080  | 7.212  | 5.010  | 5.010  | 5.010   | 13.470  | 5.010   | 12.102  | 7.943   | 7.027   | 5.010   | 9.368      | 8.134        |
| 10    | 20.180 | 5.010  | 10.781 | 5.010  | 5.010  | 9.080  | 7.212  | 5.010  | 5.010  | 5.010   | 13.470  | 5.010   | 12.102  | 7.943   | 7.027   | 5.010   | 9.368      | 8.134        |
| 11    | 10.537 | 5.000  | 5.000  | 5.000  | 5.000  | 5.000  | 5.000  | 5.000  | 5.000  | 5.000   | 5.000   | 5.000   | 5.000   | 5.000   | 5.000   | 5.000   | 5.000      | 5.000        |
| 12    | 13.826 | 5.033  | 5.031  | 5.031  | 6.377  | 10.015 | 9.390  | 5.031  | 9.639  | 5.031   | 9.390   | 5.031   | 8.752   | 9.390   | 5.031   | 10.015  | 9.390      | 7.795        |
| 13    | 15.723 | 15.157 | 30.000 | 5.131  | 6.784  | 18.969 | 24.738 | 21.981 | 24.215 | 21.013  | 30.000  | 28.366  | 30.000  | 9.490   | 5.131   | 15.120  | 13.521     | 7.978        |
| 14    | 20.837 | 30.000 | 30.000 | 30.000 | 7.936  | 18.969 | 30.000 | 30.000 | 30.000 | 30.000  | 30.000  | 28.366  | 30.000  | 30.000  | 30.000  | 30.000  | 13.521     | 8.511        |
| 15    | 0.233  | 10.016 | 24.869 | 0.000  | 0.307  | 8.854  | 15.247 | 16.850 | 14.476 | 15.882  | 20.510  | 23.235  | 21.148  | 0.000   | 0.000   | 5.005   | 4.031      | 0.083        |
| 16    | 0.233  | 10.016 | 24.869 | 0.000  | 0.307  | 8.854  | 15.247 | 16.850 | 14.476 | 15.882  | 20.510  | 23.235  | 21.148  | 0.000   | 0.000   | 5.005   | 4.031      | 0.083        |
| 17    | 0.570  | 20.000 | 34.845 | 1.000  | 1.000  | 8.830  | 22.724 | 23.724 | 22.950 | 23.918  | 27.986  | 30.113  | 31.124  | 1.000   | 1.000   | 4.981   | 3.128      | 1.000        |
| 18    | 0.897  | 0.699  | -0.562 | -6.700 | -7.231 | -0.562 | -7.019 | -8.574 | -4.444 | -5.572  | -1.019  | -5.454  | -0.562  | -7.019  | -9.339  | -0.562  | -7.019     | -0.562       |
| 19    | 7.566  | 19.054 | 0.100  | 21.157 | 0.100  | 0.782  | 19.393 | 20.204 | 15.138 | 19.470  | 1.510   | 0.100   | 0.100   | 18.448  | 21.683  | 14.540  | 0.100      | 0.423        |
| 20    | 0.100  | 0.100  | 0.100  | 0.100  | 0.230  | 0.100  | 0.100  | 0.100  | 0.100  | 0.100   | 0.100   | 0.100   | 0.100   | 0.100   | 0.100   | 0.100   | 0.100      | 0.100        |
| 21    | 6.841  | 8.900  | 5.711  | 1.110  | 1.607  | 7.876  | 6.529  | 0.566  | 6.373  | 1.437   | 6.529   | 1.732   | 6.613   | 5.376   | 0.344   | 7.876   | 6.529      | 5.087        |
| 22    | 0.522  | 0.001  | 0.001  | 0.001  | 0.001  | 0.001  | 0.001  | 0.001  | 0.001  | 0.001   | 0.001   | 0.001   | 0.001   | 0.001   | 0.001   | 0.001   | 0.001      | 0.001        |
| 23    | -0.914 | -1.000 | -0.265 | -1.000 | -0.923 | -1.000 | -0.424 | -1.000 | -1.000 | -1.000  | -0.424  | -1.000  | -1.000  | -1.000  | -1.000  | -1.000  | -0.424     | -1.000       |
| 24    | 8.628  | 20.212 | 0.001  | 20.990 | 0.801  | 2.953  | 23.443 | 23.443 | 23.283 | 23.443  | 3.826   | 0.001   | 3.491   | 21.340  | 21.115  | 21.558  | 2.416      | 0.347        |
| 25    | 0.663  | 0.499  | 0.499  | 0.400  | 0.499  | 0.499  | 0.395  | 0.370  | 0.436  | 0.418   | 0.395   | 0.370   | 0.499   | 0.395   | 0.357   | 0.499   | 0.395      | 0.499        |
| 26    | 3.289  | 0.033  | 0.031  | 0.031  | 1.377  | 5.015  | 4.390  | 0.031  | 4.639  | 0.031   | 4.390   | 0.031   | 3.752   | 4.390   | 0.031   | 5.015   | 4.390      | 2.795        |
| 27    | 0.332  | 0.001  | 1.013  | 0.001  | 0.001  | 0.001  | 0.001  | 0.001  | 0.001  | 0.001   | 0.001   | 0.001   | 0.001   | 0.001   | 0.001   | 0.001   | 0.001      | 0.001        |
| 28    | 1.644  | 0.100  | 0.100  | 0.100  | 1.293  | 0.100  | 0.100  | 1.614  | 0.100  | 1.818   | 2.266   | 1.617   | 0.121   | 2.266   | 0.100   | 0.100   | 2.266      | 0.100        |
| 29    | 1.664  | 0.108  | 0.100  | 0.100  | 0.100  | 0.100  | 0.100  | 0.100  | 0.100  | 0.100   | 0.100   | 0.100   | 0.100   | 0.100   | 0.100   | 0.100   | 0.100      | 0.100        |
| 30    | 0.117  | 0.100  | 0.100  | 0.100  | 0.100  | 0.108  | 0.100  | 0.100  | 0.100  | 0.100   | 1.846   | 0.100   | 0.100   | 1.846   | 0.723   | 0.100   | 0.759      | 0.100        |
| 31    | 0.946  | 4.918  | 1.831  | 3.500  | 2.861  | 4.866  | 3.423  | 3.047  | 4.046  | 3.773   | 1.376   | 3.049   | 0.000   | 3.423   | 2.861   | 4.985   | 3.423      | 1.108        |
| 32    | 0.015  | 0.012  | 0.010  | 0.010  | 1.356  | 4.994  | 4.369  | 0.010  | 4.618  | 0.010   | 4.369   | 0.010   | 3.731   | 4.369   | 0.010   | 4.994   | 4.369      | 2.774        |
| 33    | 1.178  | 0.010  | 0.010  | 0.010  | 0.010  | 0.010  | 0.010  | 0.010  | 0.010  | 0.010   | 0.010   | 0.010   | 0.010   | 0.010   | 0.010   | 0.010   | 0.010      | 0.010        |
| 34    | 1.575  | 0.010  | 0.010  | 0.010  | 0.010  | 0.010  | 0.010  | 0.010  | 0.010  | 0.010   | 0.010   | 0.010   | 0.010   | 0.010   | 0.010   | 0.010   | 0.010      | 0.010        |
| 35    | 0.944  | 0.010  | 0.010  | 0.010  | 0.010  | 0.010  | 0.010  | 0.010  | 0.010  | 0.010   | 4.112   | 0.010   | 5.314   | 0.010   | 0.010   | 0.010   | 0.010      | 0.010        |
| 36    | 0.107  | 10.000 | 10.000 | -4.200 | -1.703 | 1.114  | 10.000 | 10.000 | 10.000 | 10.000  | -5.977  | 10.000  | -3.845  | -4.365  | -5.562  | -6.037  | 2.605      | -1.115       |
| 37    | 0.337  | 0.031  | 9.980  | 0.000  | 0.380  | 0.000  | 0.684  | 7.395  | 0.000  | 8.364   | 7.897   | 7.398   | 7.336   | 0.000   | 0.000   | 0.000   | 0.000      | 0.000        |
| 38    | -9.644 | -0.010 | -5.781 | -0.010 | -0.010 | -4.080 | -2.212 | -0.010 | -0.010 | -0.010  | -8.470  | -0.010  | -7.102  | -2.943  | -2.027  | -0.010  | -4.368     | -3.134       |
| 39    | 0.381  | 4.984  | 4.976  | 0.000  | 0.000  | 0.000  | 2.476  | 1.874  | 3.473  | 3.037   | 2.476   | 1.878   | 4.976   | 0.000   | 0.000   | 0.000   | 0.000      | 0.000        |
| 40    | 1.499  | 4.915  | 1.826  | 7.500  | 4.572  | 4.861  | 7.371  | 6.744  | 7.288  | 7.955   | 1.414   | 6.748   | 0.475   | 7.371   | 6.436   | 8.821   | 7.033      | 1.103        |
| 41    | 5.358  | 0.690  | 0.320  | 0.470  | 0.364  | 0.320  | 0.331  | 0.527  | 0.320  | 0.555   | 0.320   | 0.390   | 0.320   | 1.495   | 0.810   | 0.320   | 0.320      | 0.320        |
| 42    | 12.698 | 3.320  | -1.412 | -0.301 | -0.400 | 0.521  | 0.819  | -0.271 | -0.337 | 0.161   | -0.296  | -0.271  | 1.031   | 3.953   | -0.258  | 2.557   | -0.296     | -0.400       |
| 43    | 13.693 | 3.820  | 0.100  | 0.100  | 0.100  | 1.021  | 1.215  | 0.100  | 0.100  | 0.580   | 0.100   | 0.100   | 1.531   | 4.349   | 0.100   | 3.057   | 0.100      | 0.100        |
| 44    | 69.068 | 35.771 | 37.280 | 34.194 | 21.869 | 27.070 | 32.462 | 25.057 | 36.450 | 27.097  | 37.357  | 24.012  | 36.598  | 51.143  | 38.535  | 36.995  | 29.649     | 23.207       |
| 45    | 56.025 | 10.393 | 8.813  | 8.753  | 9.458  | 12.785 | 12.130 | 9.120  | 12.347 | 9.368   | 16.158  | 8.161   | 16.826  | 20.280  | 11.089  | 12.785  | 12.056     | 10.565       |
| 46    | -0.330 | -0.330 | -0.001 | -0.001 | -0.001 | -0.001 | -0.001 | -0.001 | -0.001 | -0.001  | -0.001  | -0.001  | -0.001  | -0.001  | -0.001  | -0.001  | -0.001     | -0.001       |
| 47    | 0.012  | 2.444  | 0.100  | 3.504  | 0.100  | 0.737  | 2.278  | 2.278  | 2.358  | 2.278   | 0.100   | 0.100   | 0.100   | 3.329   | 3.442   | 3.221   | 0.527      | 0.100        |
| 48    | 0.000  | 0.001  | 0.001  | 0.100  | 0.143  | 0.001  | 0.105  | 0.130  | 0.064  | 0.082   | 0.105   | 0.130   | 0.001   | 0.105   | 0.143   | 0.001   | 0.105      | 0.001        |
| 49    | 9.912  | 9.889  | 9.456  | 6.410  | 0.417  | 14.859 | 10.589 | 5.352  | 12.292 | 7.047   | 10.589  | 0.521   | 13.596  | 10.589  | 4.920   | 14.859  | 10.589     | 6.388        |
| 50    | 2.216  | 0.930  | 0.111  | 0.161  | 0.111  | 0.111  | 0.115  | 0.111  | 1.539  | 0.189   | 0.111   | 0.134   | 0.111   | 0.503   | 0.111   | 0.111   | 0.111      | 0.111        |
| 51    | 18.127 | 10.000 | 10.000 | 19.522 | 11.527 | 10.000 | 10.000 | 11.299 | 10.000 | 10.000  | 10.000  | 12.100  | 10.000  | 21.288  | 25.014  | 11.849  | 10.000     | 10.060       |
| 52    | 16.171 | 3.808  | 0.150  | 0.209  | 0.209  | 1.130  | 1.324  | 0.150  | 0.209  | 0.689   | 4.311   | 0.209   | 6.944   | 0.150   | 0.209   | 3.166   | 0.209      | 0.209        |
| 53    | 1.386  | 0.100  | 0.100  | 0.150  | 0.100  | 0.100  | 0.104  | 0.100  | 0.100  | 0.178   | 0.100   | 0.123   | 0.100   | 0.492   | 0.100   | 0.100   | 0.100      | 0.100        |
| 54    | 6.679  | 2.285  | 9.327  | 1.000  | 1.848  | 8.447  | 1.000  | 1.000  | 1.000  | 1.000   | 8.558   | 10.000  | 10.000  | 1.000   | 1.000   | 1.000   | 3.233      | 4.101        |
| 55    | 0.500  | 0.500  | 0.010  | 0.010  | 0.010  | 0.010  | 0.010  | 0.010  | 1.438  | 0.010   | 0.010   | 0.010   | 0.010   | 0.010   | 0.010   | 0.010   | 0.010      | 0.010        |
| 56    | 0.819  | 0.010  | 0.010  | 0.010  | 0.032  | 0.010  | 0.010  | 0.113  | 0.010  | 0.010   | 0.010   | 0.010   | 0.010   | 0.010   | 0.255   | 0.010   | 0.010      | 0.010        |
| 57    | 0.360  | 0.360  | 0.010  | 0.010  | 0.032  | 0.010  | 0.010  | 0.113  | 0.010  | 0.010   | 0.010   | 0.010   | 0.010   | 0.010   | 0.255   | 0.010   | 0.010      | 0.010        |
| 58    | 0.830  | 0.830  | 0.011  | 0.011  | 0.011  | 0.011  | 0.011  | 0.011  | 1.439  | 0.011   | 0.011   | 0.011   | 0.011   | 0.011   | 0.011   | 0.011   | 0.011      | 0.011        |
| 59    | 0.663  | 0.500  | 0.500  | 0.500  | 0.642  | 0.500  | 0.500  | 0.500  | 0.500  | 0.500   | 0.500   | 0.500   | 0.500   | 0.500   | 0.500   | 0.500   | 0.500      | 0.500        |
| 60    | 69.566 | 24.946 | 24.893 | 23.023 | 18.704 | 21.778 | 23.831 | 20.062 | 26.058 | 21.555  | 31.331  | 19.064  | 28.580  | 40.285  | 26.546  | 26.737  | 24.883     | 18.733       |
| 61    | 0.120  | 0.120  | 0.130  | 3.100  | 4.377  | 0.138  | 3.254  | 4.007  | 2.008  | 2.554   | 5.000   | 4.003   | 0.130   | 5.000   | 5.000   | 0.130   |            |              |

|    |        |        |        |        |        |        |        |        |        |        |        |        |        |        |        |        |        |        |        |
|----|--------|--------|--------|--------|--------|--------|--------|--------|--------|--------|--------|--------|--------|--------|--------|--------|--------|--------|--------|
| 63 | 0.339  | 0.045  | 10.000 | 2.000  | 3.231  | 0.020  | 2.787  | 10.000 | 1.272  | 10.000 | 10.000 | 10.000 | 10.000 | 7.356  | 2.103  | 2.851  | 0.020  | 2.103  | 0.020  |
| 64 | -0.044 | 5.000  | 5.000  | 1.000  | 0.693  | -0.024 | 5.000  | 5.000  | 5.000  | 5.000  | 5.000  | 5.000  | 5.000  | 5.000  | 1.000  | 1.000  | -0.024 | -0.903 | 0.917  |
| 65 | 0.339  | 10.000 | 10.000 | 3.400  | 4.115  | 0.000  | 10.000 | 10.000 | 10.000 | 10.000 | 10.000 | 10.000 | 10.000 | 10.000 | 3.524  | 4.422  | 0.000  | 1.621  | 0.941  |
| 66 | 0.362  | 5.885  | 20.000 | 0.100  | 0.844  | 0.100  | 20.000 | 20.000 | 17.979 | 12.648 | 16.453 | 19.915 | 14.494 | 2.428  | 7.462  | 0.100  | 0.100  | 0.100  | 0.100  |
| 67 | 0.240  | 0.240  | -1.000 | -1.000 | 0.967  | -1.000 | -1.000 | -1.000 | -1.000 | -1.000 | 5.000  | 2.112  | -1.000 | -1.000 | -1.000 | -1.000 | -1.000 | -1.000 | -1.000 |
| 68 | -0.130 | -0.130 | 0.398  | 3.577  | 5.000  | 3.847  | 3.266  | 0.897  | -1.000 | -1.000 | 5.000  | 4.231  | 1.364  | 5.000  | 5.000  | -1.000 | 5.000  | 3.874  | 3.874  |
| 69 | 1.244  | -1.000 | 3.233  | 5.000  | -0.613 | 5.000  | 5.000  | 5.000  | 5.000  | 5.000  | -1.000 | 5.000  | 5.000  | 5.000  | 5.000  | 5.000  | 5.000  | 5.000  | -0.682 |
| 70 | 0.006  | 0.006  | 4.921  | -1.000 | 2.786  | 10.000 | 7.928  | 3.622  | 6.511  | 0.136  | 10.000 | 10.000 | 10.000 | -1.000 | -1.000 | -1.000 | -1.000 | 10.000 | -1.000 |
| 71 | 0.130  | 0.130  | 0.060  | 0.001  | 0.001  | 0.001  | 0.001  | 0.060  | 0.001  | 0.001  | 0.001  | 0.001  | 0.001  | 0.001  | 4.309  | 0.001  | 0.001  | 0.001  | 0.001  |
| 72 | 7.366  | 8.923  | 5.745  | 4.411  | 6.313  | 7.910  | 10.000 | 4.864  | 8.473  | 4.138  | 10.000 | 6.026  | 6.647  | 8.847  | 5.050  | 7.910  | 10.000 | 5.121  | 5.121  |
| 73 | 0.337  | 0.036  | 1.066  | 5.301  | 7.557  | 0.054  | 5.574  | 6.903  | 3.372  | 4.337  | 5.574  | 6.896  | 0.054  | 5.574  | 7.557  | 0.054  | 5.574  | 0.054  | 0.054  |
| 74 | 1.646  | 0.117  | 0.126  | 2.700  | 5.000  | 0.126  | 2.834  | 5.000  | 1.754  | 3.945  | 5.000  | 5.000  | 0.147  | 5.000  | 3.807  | 0.126  | 5.000  | 0.126  | 0.126  |
| 75 | 0.948  | 4.928  | 1.846  | 5.000  | 5.000  | 4.881  | 5.000  | 5.000  | 5.000  | 5.000  | 2.954  | 5.000  | 0.015  | 5.000  | 5.000  | 5.000  | 5.000  | 5.000  | 1.123  |
| 76 | 0.016  | 0.016  | 0.016  | 0.610  | 2.212  | 5.000  | 5.000  | 0.791  | 5.000  | 0.501  | 5.000  | 0.791  | 3.737  | 5.000  | 0.865  | 5.000  | 5.000  | 5.000  | 2.780  |
| 77 | 1.181  | 0.033  | 0.045  | 3.510  | 5.000  | 0.045  | 3.690  | 4.568  | 2.236  | 2.873  | 3.690  | 4.563  | 0.045  | 3.690  | 5.000  | 0.045  | 3.690  | 0.045  | 0.045  |
| 78 | 1.576  | 0.019  | 0.023  | 1.310  | 1.863  | 0.023  | 1.377  | 1.703  | 0.837  | 1.074  | 1.377  | 1.701  | 0.023  | 1.377  | 1.863  | 0.023  | 1.377  | 0.023  | 0.023  |
| 79 | 0.949  | 0.047  | 0.066  | 5.610  | 7.994  | 0.066  | 5.898  | 7.303  | 3.572  | 4.591  | 10.000 | 7.295  | 5.370  | 5.898  | 7.994  | 0.066  | 5.898  | 0.066  | 0.066  |
| 80 | 1.502  | 4.931  | 1.851  | 10.000 | 8.136  | 4.886  | 10.000 | 10.000 | 8.878  | 10.000 | 4.043  | 10.000 | 0.500  | 10.000 | 10.000 | 8.846  | 9.662  | 1.128  | 1.128  |
| 81 | 10.000 | 10.000 | 9.581  | 10.000 | 4.280  | 10.000 | 10.000 | 10.000 | 10.000 | 10.000 | 10.000 | 5.164  | 10.000 | 10.000 | 10.000 | 10.000 | 10.000 | 10.000 | 3.748  |
| 82 | 0.022  | 0.022  | 0.021  | 2.100  | 1.801  | 0.021  | 2.208  | 1.221  | 1.336  | 0.000  | 0.042  | 1.215  | 0.000  | 0.042  | 2.994  | 0.021  | 0.042  | 0.021  | 0.021  |

**Table S8:** LPP optimization results for the quad-objective system compared in Figure 6 (see Table S7). HUD is highly undesirable, UD is undesirable, T is tolerable, D is desirable and HD is highly desirable preference values of objective functions.

| Case #   | Priority | Flux    | t1 (HD)  | t2 (D)   | t3 (T)   | t4 (UD)  | t5 (HUD) | Optimal  |
|----------|----------|---------|----------|----------|----------|----------|----------|----------|
| 1 (base) | Measured | Urea    |          |          |          |          |          | 0.57     |
|          | Measured | NADPH   |          |          |          |          |          | 0.012    |
|          | Measured | Albumin |          |          |          |          |          | 9.40E-05 |
|          | Max      | GSH     |          |          |          |          |          | 9.912146 |
| 2 (base) | Mid      | Urea    | 30       | 20       | 10       | 1        | 0.1      | 20       |
|          | Mid      | NADPH   | 2.5      | 1.5      | 0.5      | 0.1      | 0.01     | 2.444167 |
|          | Mid      | Albumin | 0.1      | 0.05     | 0.005    | 0.0005   | 5.00E-05 | 0.000667 |
|          | Mid      | GSH     | 10       | 5        | 1        | 0.5      | 0.1      | 9.888667 |
| 3        | High     | Urea    | 34.86875 | 31.81773 | 28.76672 | 25.7157  | 22.66469 | 34.84499 |
|          | Low      | NADPH   | 0.1      | 0.0775   | 0.055    | 0.0325   | 0.01     | 0.1      |
|          | Low      | Albumin | 0.001    | 0.000753 | 0.000505 | 0.000258 | 1.00E-05 | 0.001    |
|          | Low      | GSH     | 0.1      | 0.07525  | 0.0505   | 0.02575  | 0.001    | 9.45646  |
| 4        | Low      | Urea    | 1        | 0.750003 | 0.500005 | 0.250008 | 1.00E-05 | 1        |
|          | High     | NADPH   | 3.50446  | 3.19782  | 2.89118  | 2.584539 | 2.277899 | 3.50446  |
|          | Low      | Albumin | 0.001    | 0.000753 | 0.000505 | 0.000258 | 1.00E-05 | 0.1      |
|          | Low      | GSH     | 0.1      | 0.07525  | 0.0505   | 0.02575  | 0.001    | 6.409994 |
| 5        | Low      | Urea    | 1        | 0.750003 | 0.500005 | 0.250008 | 1.00E-05 | 1        |
|          | Low      | NADPH   | 0.1      | 0.0775   | 0.055    | 0.0325   | 0.01     | 0.1      |
|          | High     | Albumin | 0.142571 | 0.130096 | 0.117621 | 0.105146 | 0.092671 | 0.142571 |
|          | Low      | GSH     | 0.1      | 0.07525  | 0.0505   | 0.02575  | 0.001    | 0.416544 |
| 6        | Low      | Urea    | 1        | 0.750003 | 0.500005 | 0.250008 | 1.00E-05 | 8.829971 |
|          | Low      | NADPH   | 0.1      | 0.0775   | 0.055    | 0.0325   | 0.01     | 0.737478 |
|          | Low      | Albumin | 0.001    | 0.000753 | 0.000505 | 0.000258 | 1.00E-05 | 0.001    |
|          | High     | GSH     | 14.89959 | 13.59588 | 12.29216 | 10.98845 | 9.684734 | 14.859   |
| 7        | High     | Urea    | 34.86875 | 31.81773 | 28.76672 | 25.7157  | 22.66469 | 22.72387 |
|          | High     | NADPH   | 3.50446  | 3.19782  | 2.89118  | 2.584539 | 2.277899 | 2.277899 |
|          | High     | Albumin | 0.142571 | 0.130096 | 0.117621 | 0.105146 | 0.092671 | 0.105146 |
|          | High     | GSH     | 14.89959 | 13.59588 | 12.29216 | 10.98845 | 9.684734 | 10.589   |
| 8        | High     | Urea    | 34.86875 | 31.81773 | 28.76672 | 25.7157  | 22.66469 | 23.72438 |
|          | High     | NADPH   | 3.50446  | 3.19782  | 2.89118  | 2.584539 | 2.277899 | 2.277899 |
|          | High     | Albumin | 0.142571 | 0.130096 | 0.117621 | 0.105146 | 0.092671 | 0.130233 |
|          | Low      | GSH     | 0.1      | 0.07525  | 0.0505   | 0.02575  | 0.001    | 5.35186  |
| 9        | High     | Urea    | 34.86875 | 31.81773 | 28.76672 | 25.7157  | 22.66469 | 22.94956 |
|          | High     | NADPH   | 3.50446  | 3.19782  | 2.89118  | 2.584539 | 2.277899 | 2.358001 |
|          | Low      | Albumin | 0.001    | 0.000753 | 0.000505 | 0.000258 | 1.00E-05 | 0.063606 |
|          | High     | GSH     | 14.89959 | 13.59588 | 12.29216 | 10.98845 | 9.684734 | 12.29216 |

|    |      |         |          |          |          |          |          |          |
|----|------|---------|----------|----------|----------|----------|----------|----------|
| 10 | High | Urea    | 34.86875 | 31.81773 | 28.76672 | 25.7157  | 22.66469 | 23.91807 |
|    | High | NADPH   | 3.50446  | 3.19782  | 2.89118  | 2.584539 | 2.277899 | 2.277899 |
|    | Low  | Albumin | 0.001    | 0.000753 | 0.000505 | 0.000258 | 1.00E-05 | 0.081811 |
|    | Low  | GSH     | 0.1      | 0.07525  | 0.0505   | 0.02575  | 0.001    | 7.046622 |
| 11 | High | Urea    | 34.86875 | 31.81773 | 28.76672 | 25.7157  | 22.66469 | 27.98635 |
|    | Low  | NADPH   | 0.1      | 0.0775   | 0.055    | 0.0325   | 0.01     | 0.1      |
|    | High | Albumin | 0.142571 | 0.130096 | 0.117621 | 0.105146 | 0.092671 | 0.105146 |
|    | High | GSH     | 14.89959 | 13.59588 | 12.29216 | 10.98845 | 9.684734 | 10.589   |
| 12 | High | Urea    | 34.86875 | 31.81773 | 28.76672 | 25.7157  | 22.66469 | 30.11267 |
|    | Low  | NADPH   | 0.1      | 0.0775   | 0.055    | 0.0325   | 0.01     | 0.1      |
|    | High | Albumin | 0.142571 | 0.130096 | 0.117621 | 0.105146 | 0.092671 | 0.130096 |
|    | Low  | GSH     | 0.1      | 0.07525  | 0.0505   | 0.02575  | 0.001    | 0.520627 |
| 13 | High | Urea    | 34.86875 | 31.81773 | 28.76672 | 25.7157  | 22.66469 | 31.12411 |
|    | Low  | NADPH   | 0.1      | 0.0775   | 0.055    | 0.0325   | 0.01     | 0.1      |
|    | Low  | Albumin | 0.001    | 0.000753 | 0.000505 | 0.000258 | 1.00E-05 | 0.001    |
|    | High | GSH     | 14.89959 | 13.59588 | 12.29216 | 10.98845 | 9.684734 | 13.59588 |
| 14 | Low  | Urea    | 1        | 0.750003 | 0.500005 | 0.250008 | 1.00E-05 | 1        |
|    | High | NADPH   | 3.50446  | 3.19782  | 2.89118  | 2.584539 | 2.277899 | 3.32928  |
|    | High | Albumin | 0.142571 | 0.130096 | 0.117621 | 0.105146 | 0.092671 | 0.105146 |
|    | High | GSH     | 14.89959 | 13.59588 | 12.29216 | 10.98845 | 9.684734 | 10.589   |
| 15 | Low  | Urea    | 1        | 0.750003 | 0.500005 | 0.250008 | 1.00E-05 | 1        |
|    | High | NADPH   | 3.50446  | 3.19782  | 2.89118  | 2.584539 | 2.277899 | 3.442241 |
|    | High | Albumin | 0.142571 | 0.130096 | 0.117621 | 0.105146 | 0.092671 | 0.142571 |
|    | Low  | GSH     | 0.1      | 0.07525  | 0.0505   | 0.02575  | 0.001    | 4.92     |
| 16 | Low  | Urea    | 1        | 0.750003 | 0.500005 | 0.250008 | 1.00E-05 | 4.98102  |
|    | High | NADPH   | 3.50446  | 3.19782  | 2.89118  | 2.584539 | 2.277899 | 3.220575 |
|    | Low  | Albumin | 0.001    | 0.000753 | 0.000505 | 0.000258 | 1.00E-05 | 0.001    |
|    | High | GSH     | 14.89959 | 13.59588 | 12.29216 | 10.98845 | 9.684734 | 14.859   |
| 17 | Low  | Urea    | 1        | 0.750003 | 0.500005 | 0.250008 | 1.00E-05 | 3.127813 |
|    | Low  | NADPH   | 0.1      | 0.0775   | 0.055    | 0.0325   | 0.01     | 0.527122 |
|    | High | Albumin | 0.142571 | 0.130096 | 0.117621 | 0.105146 | 0.092671 | 0.105146 |
|    | High | GSH     | 14.89959 | 13.59588 | 12.29216 | 10.98845 | 9.684734 | 10.589   |
| 18 | Low  | Urea    | 1        | 0.750003 | 0.500005 | 0.250008 | 1.00E-05 | 1        |
|    | Low  | NADPH   | 0.1      | 0.0775   | 0.055    | 0.0325   | 0.01     | 0.1      |
|    | Low  | Albumin | 0.001    | 0.000753 | 0.000505 | 0.000258 | 1.00E-05 | 0.001    |
|    | Low  | GSH     | 0.1      | 0.07525  | 0.0505   | 0.02575  | 0.001    | 6.387537 |
